# Supplementary material for: Maturation of persistent and hyperpolarization-activated inward currents shapes the differential activation of motoneuron subtypes during postnatal development
Source: eLife. 2021 Nov 16;10:e71385. doi: 10.7554/eLife.71385 (PMC8641952; doi:10.7554/eLife.71385)
Supplement: Figure 2—source data 1. [file elife-71385-fig2-data1.xlsx]

## Sheet: Fig 2A
Eigenvalues for PCs 1-25
PC1	8.63432
PC2	3.50617
PC3	2.38974
PC4	1.85983
PC5	1.37867
PC6	1.20016
PC7	0.874212
PC8	0.733504
PC9	0.669597
PC10	0.640149
PC11	0.596891
PC12	0.520269
PC13	0.401217
PC14	0.293151
PC15	0.27567
PC16	0.218853
PC17	0.215682
PC18	0.173653
PC19	0.152528
PC20	0.101448
PC21	0.0699558
PC22	0.0514011
PC23	0.0335323
PC24	0.00700137
PC25	0.0023972

## Sheet: Fig 2 B C
Loading scores for PCs 1-4
Var	PC1	PC2	PC3	PC4
Vm	-0.270092	0.347712	-0.194919	0.229254
Rin SS	-0.75072	0.0166637	-0.138994	0.339113
Rin Pass	-0.824761	-0.0449151	-0.158281	0.416068
Tau	-0.696246	-0.191347	0.11117	0.494399
CapCalc	0.544418	-0.181071	0.28818	0.303956
Rheobase ramp	0.817485	0.226404	0.153246	0.238457
spike TH Ramp	0.215824	0.773702	0.161037	0.207627
Spike Amp	-0.361953	-0.431241	0.272112	-0.0630098
Spike RT	-0.586799	0.475868	0.350089	-0.0632623
Spike HW	-0.608298	0.511871	0.383799	-0.060929
AHP amp	0.22738	0.619609	-0.199004	0.118807
AHP HW	-0.76604	-0.132448	0.303409	0.271517
Fast (1) Slow (2) trans (3)	-0.573474	-0.00903611	-0.110375	0.139842
Min FR	0.138829	0.467076	-0.411321	-0.00867986
FR 2*Rb	0.614965	0.406546	-0.456407	0.0121233
Max FR	0.0875103	-0.296714	-0.779406	0.0855915
Offset Current	0.751491	-0.425418	0.0805422	0.106291
Current range	0.579247	-0.614409	0.0464118	0.0315432
SPR Slope	0.0951881	-0.00845666	-0.724605	0.225365
Vtakeoff	-0.0250967	0.668288	0.0389884	-0.336704
dV	0.305296	0.226418	0.173999	0.609916
Ito	0.814928	0.223061	0.126241	0.124078
Itheoretical	0.861905	0.0858876	0.188122	0.344926
Itheo-Iactual	0.766731	-0.0487929	0.194911	0.394795
Rm Passive	-0.778231	0.0174509	-0.187151	0.342146

## Sheet: Fig2 D-F
PC Scores
	Figure 2 D								Fig 2 E							Fig 2 F
	PC1								PC2							PC3							PC4
	Week 1		Week 2		Week 3				Week 1		Week 2		Week 3			Week 1		Week 2		Week 3			Week 1		Week 2		Week 3
	Fast	Slow	Fast	Slow	Fast	Slow			Fast	Slow	Fast	Slow	Fast	Slow		Fast	Slow	Fast	Slow	Fast	Slow		Fast	Slow	Fast	Slow	Fast	Slow
	-0.79515	1.03021	1.92467	1.57736	4.3029	0.959408			1.50488	2.15279	0.698367	0.826278	-0.19779	1.51803		0.321573	-1.56312	-1.33139	1.16791	-0.10784	-5.70171		-2.52976	-1.0895	-0.20498	2.02913	0.855845	-0.0474
	2.15401	-3.87966	2.56301	1.15774	9.30285	2.19566			2.64403	1.66521	2.89679	-0.0182	0.013268	1.51972		-1.02967	-0.76865	-0.73156	-0.15346	-0.08474	-0.58394		-1.20128	1.19834	0.77173	0.826403	3.20346	0.42243
	1.11737	-1.58266	1.29989	-0.61063	4.32134	-4.88149			-0.00566	3.09635	1.01917	1.97053	-0.06115	-2.26108		-0.5133	1.00087	-0.44158	2.15886	-2.14926	-3.29629		-1.36754	-0.54736	0.990369	-0.17708	-1.7832	2.82863
	-0.19123	-5.13246	0.483691	-7.96466	3.81738	-2.52887			2.11981	1.6005	-0.26916	-2.07631	-5.14187	-0.39014		-1.14128	0.944346	-0.53769	1.65945	-0.18192	-3.39549		-1.37102	1.59024	-0.52085	3.23202	-0.61485	0.727227
	-1.94605	-1.35878	0.50868	-3.05911	3.08064	-0.69912			-0.73608	1.76758	0.314454	0.114711	-2.90341	-3.72391		-0.15986	1.56627	1.32986	-0.18623	0.209927	-2.86948		-0.45138	-0.13721	-0.81089	-0.22362	-0.82064	-2.39181
	0.587665	-5.49774	0.371201	-1.51264	4.6803	-1.21535			3.87157	1.56751	-0.73713	2.07897	0.729651	-1.26632		-1.65763	0.798462	0.833079	1.8742	1.01814	-6.03104		0.049407	1.4506	-1.3089	-2.08919	0.809567	0.658437
	0.184686	-3.15517	0.880859	-6.85516	1.57434	-0.40203			-0.13477	4.71982	0.936387	-1.24573	-1.61482	-1.34569		-1.16009	0.508402	0.303458	2.80595	0.263193	-5.72513		-1.43327	-1.2072	-0.21376	2.66516	-1.41322	0.233603
	-0.78141	-1.68961	1.80479	-2.45444	7.70877	-1.22274			-0.4517	2.94533	0.849262	-1.16007	2.39436	-0.77075		-0.42084	0.866149	-0.18103	1.6996	-1.06227	-6.51209		-1.74815	-0.7101	1.02917	0.797839	1.30231	1.13103
	-0.71347	-2.0956	4.07597	-1.69712		-3.25877			2.94578	1.83347	0.539518	-1.77346		-2.79684		0.184838	0.664069	0.43065	-1.79652		1.01004		-2.41068	-1.14116	1.53802	-0.14196		0.269542
	-4.75301	-2.90447	-0.51908	0.511782	1.12257	-1.98217			2.10154	3.25135	-0.55829	1.81492	1.35072	-1.42431		1.31417	2.41833	0.052883	0.924876	-1.46248	-1.31402		1.69951	0.117079	-0.80501	0.569496	-0.28126	0.7731
	-3.52792	-1.47146	-1.41995	-0.12424	2.52859				0.425904	2.10352	1.11521	-0.46046	0.616158			0.417242	1.4524	1.82196	-0.66527	1.20294			-0.88728	0.467278	-0.35798	-1.08467	-0.56989
		-2.39892	-0.00655	-2.84029	2.79339					3.64651	0.406313	-2.91136	1.00175				0.151562	-0.1131	1.2708	0.396068				1.06737	-0.10799	0.86566	-0.11967
	-0.16353	-2.44445	0.823935	-2.12077	1.42703	-5.48645			3.48357	1.79874	-0.63707	-2.73231	-2.39077	-3.8883		1.73583	0.02052	0.449664	0.827529	1.03248	-0.34792		1.07436	-1.11267	0.61401	0.360246	-1.69531	3.46947
	-2.90381	-3.55305	-0.48621	-0.26581	0.017592				1.55695	0.605003	1.80093	-0.40714	-0.70105			0.548655	1.38319	-0.64244	-0.37434	1.16505			-1.01967	-0.08881	-0.98442	-2.08265	-1.01687
	-0.91505	-2.60931	-0.62838	-2.44841	0.772896	-0.52585			0.767838	1.64982	1.13672	-1.50447	-2.9961	-2.39194		0.169082	0.816738	1.55164	1.00801	1.18782	0.71247		-0.6471	-1.34031	-0.15203	1.59801	-1.0579	-3.23921
	-0.94807	-1.02036	0.883869	-5.28554	2.90668	-3.67345			0.667058	4.00064	1.10299	0.644296	-0.53686	-1.83139		1.17928	0.054172	-0.10416	-0.61159	1.25967	1.76913		-0.41443	-1.81073	0.696544	1.95264	0.231114	0.84385
	-0.93576	-2.06731	0.719705	-3.99116	-0.69623	-1.69999			-0.67513	3.44503	-1.63549	2.70106	-0.88384	-0.18776		0.614149	0.830833	0.958034	-4.77233	0.492181	-3.52139		-1.05717	-1.91771	0.163346	1.82343	-0.27431	0.401833
	-1.69412			2.14195	4.55901	-2.72513			2.0411			0.257788	1.55319	-1.09219		0.662104			-1.50656	0.744325	-2.32203		-1.44425			-0.94835	1.7323	1.85946
	-3.07177			-1.38915	5.43734	-2.91728			-0.0376			-0.53546	-0.71517	-2.49432		1.27655			-1.84962	1.97118	2.06856		0.229333			-0.94916	1.01289	0.689213
	-2.87158		1.07734	-6.2283	4.84495	-0.43584			0.748742		0.832729	0.694453	0.674611	-0.30921		-0.02753		-0.74351	1.85459	1.19399	-0.11011		-0.49392		-0.90043	-0.28576	0.833597	-2.29635
	-2.04139	-1.30989	0.413276	-3.76779	8.46736	-1.42787			0.234147	2.37187	1.59632	0.923962	-2.08386	-5.68628		-0.28611	0.827943	-0.71438	-0.7595	0.214449	2.06999		-0.09377	0.50116	-0.49548	-0.20888	2.99047	-0.69853
	-2.57472	-4.18714	-0.16168		5.61008	-2.0707			3.40224	4.13593	0.475512		-1.43392	-2.70252		0.609402	1.72206	0.962969		-0.50042	-2.23034		-1.20869	-0.43981	-1.04489		0.820173	1.75182
	-2.20483		1.61315	-3.89516	1.72217	-1.53361			0.712913		1.0844	-0.86475	-0.20812	1.64754		-0.28987		-0.59968	-1.13438	0.115135	-0.94714		0.713332		0.896118	0.418714	-1.14029	-1.34314
	-1.78111		2.58262	-2.33393	-1.95033	-4.94612			2.38916		2.54841	-0.04705	-3.50483	-3.25069		0.706389		-2.53444	0.882039	2.17548	-6.79934		-0.55631		-0.16815	-0.01342	-1.55644	3.57732
	-1.50398		1.24839		2.00181	0.105791			2.06711		-0.76893		-2.43058	-3.25734		0.20028		0.759045		1.38346	-0.22628		-0.53986		-0.11986		-0.87744	-1.24776
	-0.49369		3.32972	-1.39084	2.68761	-0.15438			1.31113		1.91739	-1.08199	-2.382	-4.54848		-0.70087		1.13746	0.489339	0.772106	-0.00756		-0.84014		1.7342	-1.45293	0.106367	-2.01221
	-4.18154		0.152354	0.561342	1.32921	-0.83245			0.806611		1.52778	1.25091	-0.80234	-3.54723		-0.08836		1.75764	0.701879	-0.0127	1.18538		1.81825		-0.6262	-1.07832	-1.15273	-0.96649
	-1.80617		3.90846	-2.22166	1.94364	-1.08275			2.60768		-2.38453	2.6492	-2.38515	-5.24088		0.435298		1.40482	1.42811	0.666025	0.138551		-1.64091		1.53699	0.961543	-0.62521	-1.36546
	-2.45656		2.68868	-3.16004	2.89352				1.81862		-0.27589	-1.06788	1.41915			-1.29607		0.665528	-0.53837	0.411325			0.146753		0.169283	-1.18952	0.104492
	0.592988		0.014342	-4.46211	-2.17952				1.28314		0.54182	2.0646	-2.10534			0.669048		0.27213	-0.18876	0.879485			0.091162		-0.06134	1.82156	-0.83307
	-1.86933		-0.56622	-4.43116	1.45634				0.933945		-0.50427	-0.20236	0.17294			-0.02128		0.371622	1.50136	-2.68554			-1.07414		-0.65379	1.2413	-1.53459
	-2.08486		0.572351	-7.89924	1.25685				0.344851		-0.96385	-1.16157	-2.77804			0.805465		1.42208	-1.82717	0.018421			-0.58595		0.34118	4.39002	-1.39867
			2.79373	-0.03517	10.22						1.91322	0.298568	1.51833					0.12156	-1.34473	4.53397					0.325865	0.708314	7.68797
			0.249969	-3.38264							-0.00822	-1.7534						-0.71467	-1.34516						-1.38315	-0.84381
			-0.47287		-0.02366						0.633541		-1.72532					-1.63911		1.3142					-0.13901		-0.99416
			1.6022	-7.54854	2.34709						-1.14565	-1.19652	-2.96151					0.583001	1.34537	1.6839					-0.4845	3.51349	0.216665
			2.85247	-4.32785	2.54681						0.836248	-1.53214	-2.89519					-1.61537	1.05499	-0.76144					0.503941	1.56917	0.286705
			1.8493	-7.11198	2.52233						-1.85581	-1.64932	-2.53153					-0.34951	1.48483	0.239221					-1.10701	4.45634	-0.4434
			3.85644		2.94665						-0.27197		-0.50956					-0.50014		0.214613					1.10639		0.103908
			2.32683		0.978423						1.0676		0.226397					-1.18342		1.69943					-0.27922		-0.88528
			4.82816		-0.75426						1.61738		-2.31706					-1.38039		1.86214					1.90088		-1.05973
			3.17448		0.562376						-0.33325		-2.28549					-2.07369		1.60915					-0.4931		-0.69278
					-0.52775								0.609047							0.237915							-1.63732
					4.74424								-0.6014							0.733688							1.8972
			3.1034		-1.00592						-0.69407		-2.67806					-2.15051		1.2456					0.287742		-0.39123
			2.17857		5.93194						-1.53498		3.91789					0.748875		0.90668					0.66285		1.5282
			0.148968		2.07037						-2.11251		-0.48858					0.146194		0.760285					-0.75494		0.128477
			2.13881		4.79871						-0.36187		-1.19998					-1.09608		2.67869					-0.3449		1.66705
			4.12423		4.2798						1.8296		-1.30969					-2.86226		0.730832					-0.22701		0.652086
			1.2401								-0.42867							-1.29781							-0.60736
			1.71199		0.582309						-0.04784		-0.21402					-0.5455		-0.70552					0.200124		-1.49466
			3.83276		0.234845						0.679516		-1.4539					-0.53397		0.806489					0.760069		0.849867
			2.14078		2.30622						-2.63024		-1.31887					0.675508		-0.24106					-0.48981		-0.93683
			2.49774								0.567236							-0.32631							-0.53408
			-0.40947								-0.73956							1.22358							-0.84879
			-1.5823								1.65779							-2.37109							1.18717
			1.14575								-0.04605							0.927144							-0.86069
			3.70514								0.437802							-0.26542							0.373243
			-0.25359								0.928697							0.6208							0.225378
			2.25849								-0.39117							0.925246							0.013624
			1.76383								-1.55317							-1.33581							-0.60774
			3.07921								-0.85423							-1.07063							0.66776
			2.15051								0.044401							-0.37952							0.282147
			4.11819								-0.03719							-0.21623							2.07567
			-0.81854								2.67787							0.814037							0.511522
			0.08662								-0.01428							0.06711							-1.05963
			0.416072								1.25322							-0.31766							-0.24648
			1.73159								-0.34869							-0.9432							-0.35878
			-0.03615								-0.73724							0.424514							-0.92772
			0.177234								0.613638							-0.98218							-0.98953
			2.92331								2.12786							-0.22961							0.837717
			2.44044								1.52161							-1.21129							0.112823
			0.635035								-1.36378							0.150812							-0.71615
			-0.38712								-1.93393							0.327852							-0.86992
			-2.24629								-0.44334							1.06377							-0.91467
			1.35637								0.576214							0.331503							0.573033
			-0.41523								-0.01815							0.226395							-1.6864
			0.536521								-1.426							-0.52022							-1.05583

## Sheet: Fig 2 G-I
	Fig 2 G Week 1								Fig 2 H Week 2				Fig 2 I Week 3
	Fast				Slow				Fast				Slow				Fast				Slow
	PC1	PC2	PC3		PC1	PC2	PC3		PC1	PC2	PC3		PC1	PC2	PC3		PC1	PC2	PC3		PC1	PC2	PC3
	-0.79515	1.50488	0.321573		1.03021	2.15279	-1.56312		1.92467	0.698367	-1.33139		1.57736	0.826278	1.16791		4.3029	-0.19779	-0.10784		0.959408	1.51803	-5.70171
	2.15401	2.64403	-1.02967		-3.87966	1.66521	-0.76865		2.56301	2.89679	-0.73156		1.15774	-0.0182	-0.15346		9.30285	0.013268	-0.08474		2.19566	1.51972	-0.58394
	1.11737	-0.00566	-0.5133		-1.58266	3.09635	1.00087		1.29989	1.01917	-0.44158		-0.61063	1.97053	2.15886		4.32134	-0.06115	-2.14926		-4.88149	-2.26108	-3.29629
	-0.19123	2.11981	-1.14128		-5.13246	1.6005	0.944346		0.483691	-0.26916	-0.53769		-7.96466	-2.07631	1.65945		3.81738	-5.14187	-0.18192		-2.52887	-0.39014	-3.39549
	-1.94605	-0.73608	-0.15986		-1.35878	1.76758	1.56627		0.50868	0.314454	1.32986		-3.05911	0.114711	-0.18623		3.08064	-2.90341	0.209927		-0.69912	-3.72391	-2.86948
	0.587665	3.87157	-1.65763		-5.49774	1.56751	0.798462		0.371201	-0.73713	0.833079		-1.51264	2.07897	1.8742		4.6803	0.729651	1.01814		-1.21535	-1.26632	-6.03104
	0.184686	-0.13477	-1.16009		-3.15517	4.71982	0.508402		0.880859	0.936387	0.303458		-6.85516	-1.24573	2.80595		1.57434	-1.61482	0.263193		-0.40203	-1.34569	-5.72513
	-0.78141	-0.4517	-0.42084		-1.68961	2.94533	0.866149		1.80479	0.849262	-0.18103		-2.45444	-1.16007	1.6996		7.70877	2.39436	-1.06227		-1.22274	-0.77075	-6.51209
	-0.71347	2.94578	0.184838		-2.0956	1.83347	0.664069		4.07597	0.539518	0.43065		-1.69712	-1.77346	-1.79652						-3.25877	-2.79684	1.01004
	-4.75301	2.10154	1.31417		-2.90447	3.25135	2.41833		-0.51908	-0.55829	0.052883		0.511782	1.81492	0.924876		1.12257	1.35072	-1.46248		-1.98217	-1.42431	-1.31402
	-3.52792	0.425904	0.417242		-1.47146	2.10352	1.4524		-1.41995	1.11521	1.82196		-0.12424	-0.46046	-0.66527		2.52859	0.616158	1.20294
					-2.39892	3.64651	0.151562		-0.00655	0.406313	-0.1131		-2.84029	-2.91136	1.2708		2.79339	1.00175	0.396068
	-0.16353	3.48357	1.73583		-2.44445	1.79874	0.02052		0.823935	-0.63707	0.449664		-2.12077	-2.73231	0.827529		1.42703	-2.39077	1.03248		-5.48645	-3.8883	-0.34792
	-2.90381	1.55695	0.548655		-3.55305	0.605003	1.38319		-0.48621	1.80093	-0.64244		-0.26581	-0.40714	-0.37434		0.017592	-0.70105	1.16505
	-0.91505	0.767838	0.169082		-2.60931	1.64982	0.816738		-0.62838	1.13672	1.55164		-2.44841	-1.50447	1.00801		0.772896	-2.9961	1.18782		-0.52585	-2.39194	0.71247
	-0.94807	0.667058	1.17928		-1.02036	4.00064	0.054172		0.883869	1.10299	-0.10416		-5.28554	0.644296	-0.61159		2.90668	-0.53686	1.25967		-3.67345	-1.83139	1.76913
	-0.93576	-0.67513	0.614149		-2.06731	3.44503	0.830833		0.719705	-1.63549	0.958034		-3.99116	2.70106	-4.77233		-0.69623	-0.88384	0.492181		-1.69999	-0.18776	-3.52139
	-1.69412	2.0411	0.662104										2.14195	0.257788	-1.50656		4.55901	1.55319	0.744325		-2.72513	-1.09219	-2.32203
	-3.07177	-0.0376	1.27655										-1.38915	-0.53546	-1.84962		5.43734	-0.71517	1.97118		-2.91728	-2.49432	2.06856
	-2.87158	0.748742	-0.02753						1.07734	0.832729	-0.74351		-6.2283	0.694453	1.85459		4.84495	0.674611	1.19399		-0.43584	-0.30921	-0.11011
	-2.04139	0.234147	-0.28611		-1.30989	2.37187	0.827943		0.413276	1.59632	-0.71438		-3.76779	0.923962	-0.7595		8.46736	-2.08386	0.214449		-1.42787	-5.68628	2.06999
	-2.57472	3.40224	0.609402		-4.18714	4.13593	1.72206		-0.16168	0.475512	0.962969						5.61008	-1.43392	-0.50042		-2.0707	-2.70252	-2.23034
	-2.20483	0.712913	-0.28987						1.61315	1.0844	-0.59968		-3.89516	-0.86475	-1.13438		1.72217	-0.20812	0.115135		-1.53361	1.64754	-0.94714
	-1.78111	2.38916	0.706389						2.58262	2.54841	-2.53444		-2.33393	-0.04705	0.882039		-1.95033	-3.50483	2.17548		-4.94612	-3.25069	-6.79934
	-1.50398	2.06711	0.20028						1.24839	-0.76893	0.759045						2.00181	-2.43058	1.38346		0.105791	-3.25734	-0.22628
	-0.49369	1.31113	-0.70087						3.32972	1.91739	1.13746		-1.39084	-1.08199	0.489339		2.68761	-2.382	0.772106		-0.15438	-4.54848	-0.00756
	-4.18154	0.806611	-0.08836						0.152354	1.52778	1.75764		0.561342	1.25091	0.701879		1.32921	-0.80234	-0.0127		-0.83245	-3.54723	1.18538
	-1.80617	2.60768	0.435298						3.90846	-2.38453	1.40482		-2.22166	2.6492	1.42811		1.94364	-2.38515	0.666025		-1.08275	-5.24088	0.138551
	-2.45656	1.81862	-1.29607						2.68868	-0.27589	0.665528		-3.16004	-1.06788	-0.53837		2.89352	1.41915	0.411325
	0.592988	1.28314	0.669048						0.014342	0.54182	0.27213		-4.46211	2.0646	-0.18876		-2.17952	-2.10534	0.879485
	-1.86933	0.933945	-0.02128						-0.56622	-0.50427	0.371622		-4.43116	-0.20236	1.50136		1.45634	0.17294	-2.68554
	-2.08486	0.344851	0.805465						0.572351	-0.96385	1.42208		-7.89924	-1.16157	-1.82717		1.25685	-2.77804	0.018421
									2.79373	1.91322	0.12156		-0.03517	0.298568	-1.34473		10.22	1.51833	4.53397
									0.249969	-0.00822	-0.71467		-3.38264	-1.7534	-1.34516
									-0.47287	0.633541	-1.63911						-0.02366	-1.72532	1.3142
									1.6022	-1.14565	0.583001		-7.54854	-1.19652	1.34537		2.34709	-2.96151	1.6839
									2.85247	0.836248	-1.61537		-4.32785	-1.53214	1.05499		2.54681	-2.89519	-0.76144
									1.8493	-1.85581	-0.34951		-7.11198	-1.64932	1.48483		2.52233	-2.53153	0.239221
									3.85644	-0.27197	-0.50014						2.94665	-0.50956	0.214613
									2.32683	1.0676	-1.18342						0.978423	0.226397	1.69943
									4.82816	1.61738	-1.38039						-0.75426	-2.31706	1.86214
									3.17448	-0.33325	-2.07369						0.562376	-2.28549	1.60915
																	-0.52775	0.609047	0.237915
																	4.74424	-0.6014	0.733688
									3.1034	-0.69407	-2.15051						-1.00592	-2.67806	1.2456
									2.17857	-1.53498	0.748875						5.93194	3.91789	0.90668
									0.148968	-2.11251	0.146194						2.07037	-0.48858	0.760285
									2.13881	-0.36187	-1.09608						4.79871	-1.19998	2.67869
									4.12423	1.8296	-2.86226						4.2798	-1.30969	0.730832
									1.2401	-0.42867	-1.29781
									1.71199	-0.04784	-0.5455						0.582309	-0.21402	-0.70552
									3.83276	0.679516	-0.53397						0.234845	-1.4539	0.806489
									2.14078	-2.63024	0.675508						2.30622	-1.31887	-0.24106
									2.49774	0.567236	-0.32631
									-0.40947	-0.73956	1.22358
									-1.5823	1.65779	-2.37109
									1.14575	-0.04605	0.927144
									3.70514	0.437802	-0.26542
									-0.25359	0.928697	0.6208
									2.25849	-0.39117	0.925246
									1.76383	-1.55317	-1.33581
									3.07921	-0.85423	-1.07063
									2.15051	0.044401	-0.37952
									4.11819	-0.03719	-0.21623
									-0.81854	2.67787	0.814037
									0.08662	-0.01428	0.06711
									0.416072	1.25322	-0.31766
									1.73159	-0.34869	-0.9432
									-0.03615	-0.73724	0.424514
									0.177234	0.613638	-0.98218
									2.92331	2.12786	-0.22961
									2.44044	1.52161	-1.21129
									0.635035	-1.36378	0.150812
									-0.38712	-1.93393	0.327852
									-2.24629	-0.44334	1.06377
									1.35637	0.576214	0.331503
									-0.41523	-0.01815	0.226395
									0.536521	-1.426	-0.52022
