# Supplementary material for: Maturation of persistent and hyperpolarization-activated inward currents shapes the differential activation of motoneuron subtypes during postnatal development
Source: eLife. 2021 Nov 16;10:e71385. doi: 10.7554/eLife.71385 (PMC8641952; doi:10.7554/eLife.71385)
Supplement: Figure 3—figure supplement 1—source data 1. [file elife-71385-fig3-figsupp1-data1.xlsx]

## Sheet: Supp Fig1A
Supp Fig 1A: Correlation between rheobase assessed on current ramp and during current step during week 1
Del Ramp Rb	Del step Rb		Imm ramp Rb	Imm Step Rb
493	460
			757	800
580	550		123	100
420	380		201	360
197	130		146	140
465	380		409	310
344	340		101	90
292	230		174	275
589	480		266	500
197	110		373	290
134	100		443	300
			466	340
540	490		269	205
232	210		310	210
271	210		189	160
401	319		281	210
326	190		725	410
192	130		493	439
154	85			140
120	90		218	219
194	130		130	80
296	200		356	250
208	110		388	240
296	230		370	290
308	240
384	250
118.2	75
323	275
166	120
489	410
248	210
224	156

## Sheet: Supp Fig 1B
Supp Fig 1B: Correlation between rheobase assessed on current ramp and during current step during week 2
Del Ramp Rb	Del step Rb		Imm ramp Rb	Imm Step Rb
665	550		408	625
742	850		632	580
343	160		525	625
362	260		65	35
610	480		208	219
408	250		549	420
485	380		69	80
668.9	620		150	120
988	950		190	170
295	200		563	300
332	200		480	339
396	300		115	105
395	220		148	110
429	400		469	350
536	450		135	90
380	320		73.5	100
308	180		65	110
1288	1225		891	790
1619	1520		164	280
467	300		63	50
424	350		109	90
527	480			100
435	310		70	70
889	840		225	180
429	260		97.5	200
932	810		253	240
661.9	520		781	770
778	560		291	260
578	520		90.9	50
445	300		118	100
276	170		88.2	70
447	290		23.1	20
815	790		266	315
405	260		55.8	50
216	160		64.6	45
527	400		63.1	35
665	690		75.8	80
468	300		44	60
835	790
611	500
705	380
779	750
315	370
646
508	370
471	360
149	140
866	750
932	850
446	300
441	260
718	500
459	560
829	860
324	160
287	260
187	150
710	650
1010	919
440
368	310
591	550
514	500
600	480
506	350
705	700
481	400
369	270
471	400
541	430
315	250
358	250
933	1300
819	750
616	500
782	750
401	319
152.7	110
328	200
364	300
341	300
274	200

## Sheet: Supp Fig 1C
Supp Fig 1C: Correlation between rheobase assessed on current ramp and during current step during week 3
Del Ramp Rb	Del step Rb		Imm ramp Rb	Imm Step Rb
878	920		285	300
2471	2550		797	800
891	1290		33	10
259	400		122	80
564	680		195	270
1250	1800		301	160
438	400		115
2022	2400		119	130
312.6	200		99.9	50
450	429		140	160
877	880		31.5	28
854	900		27	10
510	350		41.3	50
465	300		22.8	15
273	309		427	675
883	600		135	130
285	180		197	180
1513.6	1650		83.4	80
1433.6	1500		145	100
2244	1251		586	370
1768	2000		95	60
1200	1400		42	80
723	550		198	600
172	110		27	20
465	800		178	240
598	1000		145	140
667	950		179.3	150
296	500		92	80
970	725
127	70
405	500
335	339
2928.5	1800
418	350
400	320
431	350
416	325
521	500
1358.9	1000
647	390
226	210
270	260
428	240
1197	1400
243	80
1862	2250
613	500
1087	1500
824	300
1461	1424
356	290
334.7	220
650	520

## Sheet: Supp Fig 1D
Supplementary Figure 1D: Maturation of rheobase in delayed and immediate firing motoneurons measured with depolarizing current ramps
Week 1		Week 2		Week 3
Del	Imm	Del	Imm	Del	Imm
493	757	665	408	878	285
961	123	742	632	2471	797
580	201	343		891	33
420	146	362	525	259	122
197	409	610	65	564	195
465	101	408	208	1250	301
344	174	485	549	438	115
292	266	668.9	69	2022	119
589	373	988	150	312.6	99.9
197	443	295	190	450	140
134	466	332	563	877	31.5
1010	269	396	480	854	27
540	310	395	115	510	41.3
232	189	429	148	465	22.8
271	281	536	469	273	427
401	725	380	135	883	135
326	493	308	73.5	285	197
192		1288	65	1513.6	83.4
154	218	1619	891	1433.6	145
120	130	467	164	2244	586
194	356	424	63	1768	95
296	388	527	109	1200	42
208	370	435		723	198
296		889	70	172	27
308		429	225	465	178
384		932	97.5	598	145
118.2		661.9	253	667	179.3
323		778	781	296	92
166		578	291	970
489		445	90.9	127
248		276	118	405
224		447	88.2	335
		815	23.1	2928.5
		405	266	418
		216	55.8	400
		527	64.6	431
		665	63.1	416
		468	75.8	521
		835	44	1358.9
		611		647
		705		226
		779		270
		315		428
		646		1197
		508		243
		471		1862
		149		613
		866		1087
		932		824
		446		1461
		441		356
		718		334.7
		459		650
		829
		324
		287
		187
		710
		1010
		440
		368
		591
		514
		600
		506
		705
		481
		369
		471
		541
		315
		358
		933
		819
		782
		401
		152.7
		328
		364
		341
		274

## Sheet: Sheet5
Supplementary Figure 1E: Maturation of rheobase in delayed and immediate firing motoneurons measured with 5 s depolarizing current step
Week 1		Week 2		Week 3
Del	Imm	Del	Imm	Del	Imm
460	800	550	625	920	300
950	100	850	580	2550	800
550	360	160	625	1290	10
380	140	260	35	400	80
130	310	480	219	680	270
380	90	250	420	1800	160
340	275	380	80	400
230	500	620	120	2400	130
480	290	950	170	200	50
110	300	200	300	429	160
100	340	200	339	880	28
775	205	300	105	900	10
490	210	220	110	350	50
210	160	400	350	300	15
210	210	450	90	309	675
319	410	320	100	600	130
190	439	180	110	180	180
130	140	1225	790	1650	80
85	219	1520	280	1500	100
90	80	300	50	1251	370
130	250	350	90	2000	60
200	240	480	100	1400	80
110	290	310	70	550	600
230	130	840	180	110	20
240		260	200	800	240
250		810	240	1000	140
75		520	770	950	150
275		560	260	500	80
120		520	50	725
410		300	100	70
210		170	70	500
156		290	20	339
250		790	315	1800
		260	50	350
		160	45	320
		400	35	350
		690	80	325
		300	60	500
		790		1000
		500		390
		380		210
		750		260
		370		240
				1400
		370		80
		360		2250
		140		500
		750		1500
		850		300
		300		1424
		260		290
		500		220
		560		520
		860
		160
		260
		150
		650
		919
		310
		550
		500
		480
		350
		700
		400
		270
		400
		430
		250
		250
		1300
		750
		500
		750
		319
		110
		200
		300
		300
		200
