# Supplementary material for: Maturation of persistent and hyperpolarization-activated inward currents shapes the differential activation of motoneuron subtypes during postnatal development
Source: eLife. 2021 Nov 16;10:e71385. doi: 10.7554/eLife.71385 (PMC8641952; doi:10.7554/eLife.71385)
Supplement: Figure 3—source data 1. [file elife-71385-fig3-data1.xlsx]

## Sheet: Fig 3 D
Figure 3 D Recruitment Current
	Week 1			Week 2			Week 3
	Fast	Slow		Fast	Slow		Fast	Slow
	493	757		665	408		878	285
	961	123		742	632		2471	797
	580	201		343			891	33
	420	146		362	525		259	122
	197	409		610	65		564	195
	465	101		408	208		1250	301
	344	174		485	549		438	115
	292	266		668.9	69		2022	119
	589	373		988	150		312.6	99.9
	197	443		295	190		450	140
	134	466		332	563		877	31.5
	1010	269		396	480		854	27
	540	310		395	115		510	41.3
	232	189		429	148		465	22.8
	271	281		536	469		273	427
	401	725		380	135		883	135
	326	493		308	73.5		285	197
	192			1288	65		1513.6	83.4
	154	218		1619	891		1433.6	145
	120	130		467	164		2244	586
	194	356		424	63		1768	95
	296	388		527	109		1200	42
	208	370		435			723	198
	296			889	70		172	27
	308			429	225		465	178
	384			932	97.5		598	145
	118.2			661.9	253		667	179.3
	323			778	781		296	92
	166			578	291		970
	489			445	90.9		127
	248			276	118		405
	224			447	88.2		335
				815	23.1		2928.5
				405	266		418
				216	55.8		400
				527	64.6		431
				665	63.1		416
				468	75.8		521
				835	44		1358.9
				611			647
				705			226
				779			270
				315			428
				646			1197
				508			243
				471			1862
				149			613
				866			1087
				932			824
				446			1461
				441			356
				718			334.7
				459			650
				829
				324
				287
				187
				710
				1010
				440
				368
				591
				514
				600
				506
				705
				481
				369
				471
				541
				315
				358
				933
				819
				782
				401
				152.7
				328
				364
				341
				274

## Sheet: Fig 3 E
	Figure 3 E cumulative proportion plots
	Recruitment Gain
		Week 1	Week 2	Week 3
	0	0	0.00847458	0.0123457
	50	0	0.0932203	0.0864198
	100	0.0740741	0.152542	0.17284
	150	0.185185	0.20339	0.246914
	200	0.351852	0.237288	0.308642
	250	0.444444	0.271186	0.37037
	300	0.574074	0.338983	0.432099
	350	0.666667	0.415254	0.469136
	400	0.759259	0.483051	0.518519
	450	0.814815	0.601695	0.604938
	500	0.87037	0.652542	0.62963
	550	0.888889	0.711864	0.641975
	600	0.925926	0.754237	0.679012
	650	0.925926	0.805085	0.716049
	700	0.925926	0.838983	0.728395
	750	0.962963	0.847458	0.728395
	800	0.962963	0.898305	0.753086
	850	0.962963	0.923729	0.765432
	900	0.962963	0.940678	0.814815
	950	0.981481	0.966102	0.82716
	1000	1	0.983051	0.82716
	1050	1	0.983051	0.82716
	1100	1	0.983051	0.839506
	1150	1	0.983051	0.839506
	1200	1	0.983051	0.864198
	1250	1	0.983051	0.876543
	1300	1	0.991525	0.876543
	1350	1	0.991525	0.888889
	1400	1	0.991525	0.888889
	1450	1	0.991525	0.91358
	1500	1	0.991525	0.925926
	1550	1	0.991525	0.925926
	1600	1	1	0.925926
	1650	1	1	0.925926
	1700	1	1	0.925926
	1750	1	1	0.938272
	1800	1	1	0.938272
	1850	1	1	0.950617
	1900	1	1	0.950617
	1950	1	1	0.950617
	2000	1	1	0.962963
	2050	1	1	0.962963
	2100	1	1	0.962963
	2150	1	1	0.962963
	2200	1	1	0.962963
	2250	1	1	0.975309
	2300	1	1	0.975309
	2350	1	1	0.975309
	2400	1	1	0.975309
	2450	1	1	0.987654
	2500	1	1	0.987654
	2550	1	1	0.987654
	2600	1	1	0.987654
	2650	1	1	0.987654
	2700	1	1	0.987654
	2750	1	1	0.987654
	2800	1	1	0.987654
	2850	1	1	0.987654
	2900	1	1	0.987654
	2950	1	1	1

## Sheet: Fig 3F
Fig 3 F Capacitance
	Week 1			Week 2			Week 3
	Fast	Slow		Fast	Slow		Fast	Slow
	313.559	378.289		325.688	668.05		694.915	130.895
	392.308	204.118		428.571	477.366		807.692	321.564
	341.869	176.418		579.33	252.761		88.0503	220.61
	233.766	210.744		323.684	558.912		635.749	169.541
	189.498	320.337		466.38	341.297		344.156	116.809
	181.452	235.411		347.826	283.898		213.244	173.139
	347.594	139.344		778.261	127.285		238.784	310.375
	316.053	266.106		516.014	454.128		386.598	126.943
	204.878	295.575		313.402	330.179		323.665	400.223
	256.131	223.583		317.396	241.084		179.882	301.815
	272.472	343.87		446.377	355.114		275	212.932
	542.373	263.132		393.782	460.04		346.988	228.054
	284.536	195.62		721.659	357.498		368.889	386.489
	258.876	216.809		237.784	477.345		369.146	163.836
	376.585	206.607		522.586	473.413		371.622	204.194
	423.8	290.294		465.562	448.588		473.684	275.51
	396.27	349.076		469.149	237.434		307.296	212.435
	112	306.03		934.94	112.057		258.103	281.776
	307.355	157.197		1087.5	273.543		569.395	419.662
	223.65	152.413		411.1	195.824		712.644	231.626
	216.611	233.333		394.083	115.92		470.81	433.404
	164.667	360.839		396.067	90.7563		511.811	322.268
	321.466	151.213		680.315	67.1806		304.387	115.703
	275.486	169.192		606.742	152.595		345.769	146.602
	304.878			495.074	323.944		596.027	291.092
	200.772			1172.49	131.279		85.5107	253.425
	179.105			423.015	377.649		63.1692	382.134
	206.78			1191.49	352.941		406	394.636
	212.042			519.337	216.034		346.821
	471.572			261.793	257.649		239.354
	226.268			297.114	184.989		207.077
	306.43			668.863	242.616		373.377
	330.46			315.582	163.855		1257.58
				317.949	593.504		219.215
				276.029	200		562.814
				603.989	477.118		719.745
				610	296.571		663.657
				585.106	377.535		787.037
				934.426	415.512		1283.14
				374.745			481.707
				653.595			544.361
				566.553			524.664
				506.897			251.88
				290			510.671
				361.111			333.333
				861.423			495.495
				326.087			741.936
				525.581			1091.84
				420			863.071
				548.032			173.488
				649.447			232.24
				517.857			731.915
				451.613			362.229
				138.493
				499.279
				308.123
				242.769
				350.476
				418.719
				857.39
				308.458
				437.055
				641.758
				598.87
				430.642
				725.807
				437.968
				270.784
				401.772
				283.333
				458.875
				260.123
				625
				377.593
				263.975
				542.787
				510.345
				466.069
				303.488
				713.987
				268.331
				434.936

## Sheet: Fig 3 G
Fig 3G Input Resistance
	Week 1			Week 2			Week 3
	Fast	Slow		Fast	Slow		Fast	Slow
	0.0354	0.0304		0.0218	0.0241		0.0118	0.05195
	0.021667	0.1117		0.0273	0.0243		0.0078	0.03172
	0.026033	0.05555		0.03435	0.04075		0.02385	0.1999
	0.05005	0.1694		0.038	0.0331		0.010853	0.13625
	0.0876	0.04745		0.03495	0.2051		0.0154	0.0351
	0.0496	0.1508		0.0345	0.0708		0.01782	0.1236
	0.0374	0.0488		0.023	0.051067		0.02764	0.05735
	0.0598	0.0357		0.0281	0.1526		0.01164	0.1158
	0.05125	0.0565		0.02425	0.066933		0.039238	0.0897
	0.1468	0.0653		0.04915	0.0701		0.04225	0.1047
	0.1068	0.06485		0.05175	0.0352		0.02	0.186444
	0.02655	0.09995		0.0386	0.02978		0.02075	0.27625
	0.0485	0.0685		0.036167	0.1007		0.0225	0.212167
	0.0676	0.0821		0.04584	0.063267		0.0363	0.4004
	0.05125	0.09535		0.04516	0.02915		0.0296	0.01812
	0.0479	0.05615		0.038233	0.09385		0.0171	0.098
	0.0429	0.0487		0.031333	0.1512		0.05825	0.0772
	0.0375	0.0879		0.010375	0.141		0.01666	0.09795
	0.0911	0.0528		0.010667	0.0223		0.01124	0.0946
	0.0778	0.1181		0.0287	0.06945		0.0087	0.02245
	0.07525	0.036		0.028167	0.1294		0.01062	0.0473
	0.0917	0.0715		0.0356	0.119		0.0127	0.0723
	0.0955	0.10515		0.021167	0.0908		0.02234	0.0363
	0.06425	0.0792		0.029667	0.1291		0.05495	0.206
	0.0656			0.027067	0.0781		0.01208	0.03985
	0.0518			0.015267	0.0876		0.06315	0.0438
	0.1675			0.041133	0.0519		0.0934	0.0403
	0.059			0.01175	0.0323		0.018	0.0522
	0.09965			0.02715	0.05925		0.02076
	0.0299			0.0424	0.0621		0.0681
	0.0769			0.0589	0.1892		0.03815
	0.0731			0.03035	0.1422		0.0308
	0.0348			0.02535	0.2905		0.0066
				0.039	0.033867		0.03695
				0.06195	0.0825		0.02985
				0.01755	0.1027		0.0157
				0.02	0.2158		0.02215
				0.0188	0.1282		0.0216
				0.0122	0.1805		0.00943
				0.02455			0.0328
				0.0153			0.03325
				0.01465			0.0223
				0.029			0.0532
				0.02			0.01312
				0.018			0.0684
				0.0267			0.0111
				0.0414			0.0124
				0.0215			0.0098
				0.018333			0.01205
				0.03175			0.02248
				0.0271			0.0366
				0.0168			0.047
				0.02015			0.0323
				0.02455
				0.03465
				0.0357
				0.1141
				0.02625
				0.01624
				0.014463
				0.0402
				0.02105
				0.02275
				0.0177
				0.02415
				0.0186
				0.06005
				0.0421
				0.03385
				0.03
				0.03465
				0.04075
				0.0128
				0.0241
				0.0322
				0.02045
				0.029
				0.03905
				0.086
				0.02395
				0.03205
				0.0312

## Sheet: Fig 3 H I
Figure 3 H										Figure 3 I
	Week 1			Week 2			Week 3			Week 1			Week 2			Week 3
	Rec I	Cap		Rec I	Cap		Rec I	Cap		Rec I	Rin		Rec I	Rin		Rec I	Rin
Fast	493	313.559	Fast	665	325.688	Fast	878	694.915	Fast	493	0.0354	Fast	665	0.0218	Fast	878	0.0118
	961	392.308		742	428.571		2471	807.692		961	0.021667		742	0.0273		2471	0.0078
	580	341.869		343	579.33		891	88.0503		580	0.026033		343	0.03435		891	0.02385
	420	233.766		362	323.684		259	635.749		420	0.05005		362	0.038		259	0.010853
	197	189.498		610	466.38		564	344.156		197	0.0876		610	0.03495		564	0.0154
	465	181.452		408	347.826		1250	213.244		465	0.0496		408	0.0345		1250	0.01782
	344	347.594		485	778.261		438	238.784		344	0.0374		485	0.023		438	0.02764
	292	316.053		668.9	516.014		2022	386.598		292	0.0598		668.9	0.0281		2022	0.01164
	589	204.878		988	313.402		312.6	323.665		589	0.05125		988	0.02425		312.6	0.039238
	197	256.131		295	317.396		450	179.882		197	0.1468		295	0.04915		450	0.04225
	134	272.472		332	446.377		877	275		134	0.1068		332	0.05175		877	0.02
	1010	542.373		396	393.782		854	346.988		1010	0.02655		396	0.0386		854	0.02075
	540	284.536		395	721.659		510	368.889		540	0.0485		395	0.036167		510	0.0225
	232	258.876		429	237.784		465	369.146		232	0.0676		429	0.04584		465	0.0363
	271	376.585		536	522.586		273	371.622		271	0.05125		536	0.04516		273	0.0296
	401	423.8		380	465.562		883	473.684		401	0.0479		380	0.038233		883	0.0171
	326	396.27		308	469.149		285	307.296		326	0.0429		308	0.031333		285	0.05825
	192	112		1288	934.94		1513.6	258.103		192	0.0375		1288	0.010375		1513.6	0.01666
	154	307.355		1619	1087.5		1433.6	569.395		154	0.0911		1619	0.010667		1433.6	0.01124
	120	223.65		467	411.1		2244	712.644		120	0.0778		467	0.0287		2244	0.0087
	194	216.611		424	394.083		1768	470.81		194	0.07525		424	0.028167		1768	0.01062
	296	164.667		527	396.067		1200	511.811		296	0.0917		527	0.0356		1200	0.0127
	208	321.466		435	680.315		723	304.387		208	0.0955		435	0.021167		723	0.02234
	296	275.486		889	606.742		172	345.769		296	0.06425		889	0.029667		172	0.05495
	308	304.878		429	495.074		465	596.027		308	0.0656		429	0.027067		465	0.01208
	384	200.772		932	1172.49		598	85.5107		384	0.0518		932	0.015267		598	0.06315
	118.2	179.105		661.9	423.015		667	63.1692		118.2	0.1675		661.9	0.041133		667	0.0934
	323	206.78		778	1191.49		296	406		323	0.059		778	0.01175		296	0.018
	166	212.042		578	519.337		970	346.821		166	0.09965		578	0.02715		970	0.02076
	489	471.572		445	261.793		127	239.354		489	0.0299		445	0.0424		127	0.0681
	248	226.268		276	297.114		405	207.077		248	0.0769		276	0.0589		405	0.03815
	224	306.43		447	668.863		335	373.377		224	0.0731		447	0.03035		335	0.0308
		330.46		815	315.582		2928.5	1257.58			0.0348		815	0.02535		2928.5	0.0066
				405	317.949		418	219.215					405	0.039		418	0.03695
Slow	757	378.289		216	276.029		400	562.814	Slow	757	0.0304		216	0.06195		400	0.02985
	123	204.118		527	603.989		431	719.745		123	0.1117		527	0.01755		431	0.0157
	201	176.418		665	610		416	663.657		201	0.05555		665	0.02		416	0.02215
	146	210.744		468	585.106		521	787.037		146	0.1694		468	0.0188		521	0.0216
	409	320.337		835	934.426		1358.9	1283.14		409	0.04745		835	0.0122		1358.9	0.00943
	101	235.411		611	374.745		647	481.707		101	0.1508		611	0.02455		647	0.0328
	174	139.344		705	653.595		226	544.361		174	0.0488		705	0.0153		226	0.03325
	266	266.106		779	566.553		270	524.664		266	0.0357		779	0.01465		270	0.0223
	373	295.575		315	506.897		428	251.88		373	0.0565		315	0.029		428	0.0532
	443	223.583		646	290		1197	510.671		443	0.0653		646	0.02		1197	0.01312
	466	343.87		508	361.111		243	333.333		466	0.06485		508	0.018		243	0.0684
	269	263.132		471	861.423		1862	495.495		269	0.09995		471	0.0267		1862	0.0111
	310	195.62		149	326.087		613	741.936		310	0.0685		149	0.0414		613	0.0124
	189	216.809		866	525.581		1087	1091.84		189	0.0821		866	0.0215		1087	0.0098
	281	206.607		932	420		824	863.071		281	0.09535		932	0.018333		824	0.01205
	725	290.294		446	548.032		1461	173.488		725	0.05615		446	0.03175		1461	0.02248
	493	349.076		441	649.447		356	232.24		493	0.0487		441	0.0271		356	0.0366
		306.03		718	517.857		334.7	731.915			0.0879		718	0.0168		334.7	0.047
	218	157.197		459	451.613		650	362.229		218	0.0528		459	0.02015		650	0.0323
	130	152.413		829	138.493					130	0.1181		829	0.02455
	356	233.333		324	499.279	Slow	285	130.895		356	0.036		324	0.03465	Slow	285	0.05195
	388	360.839		287	308.123		797	321.564		388	0.0715		287	0.0357		797	0.03172
	370	151.213		187	242.769		33	220.61		370	0.10515		187	0.1141		33	0.1999
		169.192		710	350.476		122	169.541					710	0.02625		122	0.13625
				1010	418.719		195	116.809					1010	0.01624		195	0.0351
				440	857.39		301	173.139					440	0.014463		301	0.1236
				368	308.458		115	310.375					368	0.0402		115	0.05735
				591	437.055		119	126.943					591	0.02105		119	0.1158
				514	641.758		99.9	400.223					514	0.02275		99.9	0.0897
				600	598.87		140	301.815					600	0.0177		140	0.1047
				506	430.642		31.5	212.932					506	0.02415		31.5	0.186444
				705	725.807		27	228.054					705	0.0186		27	0.27625
				481	437.968		41.3	386.489					481	0.06005		41.3	0.212167
				369	270.784		22.8	163.836					369	0.0421		22.8	0.4004
				471	401.772		427	204.194					471	0.03385		427	0.01812
				541	283.333		135	275.51					541	0.03		135	0.098
				315	458.875		197	212.435					315	0.03465		197	0.0772
				358	260.123		83.4	281.776					358	0.04075		83.4	0.09795
				933	625		145	419.662					933	0.0128		145	0.0946
				819	377.593		586	231.626					819	0.0241		586	0.02245
					263.975		95	433.404						0.0322		95	0.0473
				782	542.787		42	322.268					782	0.02045		42	0.0723
				401	510.345		198	115.703					401	0.029		198	0.0363
				152.7	466.069		27	146.602					152.7	0.03905		27	0.206
				328	303.488		178	291.092					328	0.086		178	0.03985
				364	713.987		145	253.425					364	0.02395		145	0.0438
				341	268.331		179.3	382.134					341	0.03205		179.3	0.0403
				274	434.936		92	394.636					274	0.0312		92	0.0522
			Slow	408	668.05							Slow	408	0.0241
				632	477.366								632	0.0243
					252.761									0.04075
				525	558.912								525	0.0331
				65	341.297								65	0.2051
				208	283.898								208	0.0708
				549	127.285								549	0.051067
				69	454.128								69	0.1526
				150	330.179								150	0.066933
				190	241.084								190	0.0701
				563	355.114								563	0.0352
				480	460.04								480	0.02978
				115	357.498								115	0.1007
				148	477.345								148	0.063267
				469	473.413								469	0.02915
				135	448.588								135	0.09385
				73.5	237.434								73.5	0.1512
				65	112.057								65	0.141
				891	273.543								891	0.0223
				164	195.824								164	0.06945
				63	115.92								63	0.1294
				109	90.7563								109	0.119
					67.1806									0.0908
				70	152.595								70	0.1291
				225	323.944								225	0.0781
				97.5	131.279								97.5	0.0876
				253	377.649								253	0.0519
				781	352.941								781	0.0323
				291	216.034								291	0.05925
				90.9	257.649								90.9	0.0621
				118	184.989								118	0.1892
				88.2	242.616								88.2	0.1422
				23.1	163.855								23.1	0.2905
				266	593.504								266	0.033867
				55.8	200								55.8	0.0825
				64.6	477.118								64.6	0.1027
				63.1	296.571								63.1	0.2158
				75.8	377.535								75.8	0.1282
				44	415.512								44	0.1805
