# Supplementary material for: Maturation of persistent and hyperpolarization-activated inward currents shapes the differential activation of motoneuron subtypes during postnatal development
Source: eLife. 2021 Nov 16;10:e71385. doi: 10.7554/eLife.71385 (PMC8641952; doi:10.7554/eLife.71385)
Supplement: Figure 4—figure supplement 1—source data 1. [file elife-71385-fig4-figsupp1-data1.xlsx]

## Sheet: S1 C
Supp Fig 1 C correlation between input resistance and ePIC by delta I (derec I - rec I) on triangular current ramp across postnatal development
	Week 1			Week 2			Week 3
	Rin	delta I		Rin	delta I		Rin	delta I
	22.7	71		23.5	-451.2		10.4	-291
	43.55	123		23.2	-273		5.87	-929
	67.7	81.9		26.6	-376		10.9	-326
	45.36	-317		34.3	-247		8.74	-522
	34.8	-181		23.9	-324		25.2	-382
	50.5	70		23.7	-423		11.9	-189
	70	-61		18.4	-411		19.6	-545
	22	-510		44.6	-95		6.9	-976
	71	-111		35.7	-260		22.1	-70.5
	61.6	-121		32	-220		11.6	-548
	55.6	-141		44.5	-149		10.5	-328
	72.1	-40		35.8	-267		10.2	-440
	29.4	-142		26.9	-116		27.9	-372
	55.8	-240		26.6	-190		28	-381
	37.7	-49		9.8	-601		8.5	-470
	35.4	-225		2.8	-532		40.3	-215
	17.2	72.8		24.7	-289		19.4	-236
	78	88.5		26	-281		4.76	-606
	51	-178		33.1	-119		0.578	-250
	90	-49		26.9	-196		0.057	-440
	61.2	-69		24.1	-224		8.6	-534
	58.3	-118		21.06	-418		9.7	-200
	61.5			14.4	-104		23.4	-113
	62.8	91.6		34.1	-297		5.8	-507
	70.5	30		23	-505		6.9	-347
	54	24.5		17.1	-235		9.3	-327
	68.5	184		29.4	-153		8.2	-508
				29.3	-156		43.9	102
				26.2	-232		16.6	25.5
				35.2	-222		67.8	8.5
				50	-100.6		61.8	32.3
				14.3	-294		30.3	63
				15.9	-116		60.1	5
				20.2	-308		67.2	15.8
				9.4	-273		49.5	22
				23.1	-421		18	-225.78
				16.6	-477		68	-387.912
				12.8	-204		36	-309.58
				19.3	-132		26.7	-84.924
				18.9	-329		1.11	-361.8
				17.3	-341			-218.646
				30.5	-186		16.1	-208.576
				13.9	-341		13.9	-152.608
				16.4	-428		16.1	-278.061
				32.2	-265		10.3	-245.208
				18.7	-365		27.4	-502.84
				13	-543		33.97	-256.24
				14.8	-265		18	-275.88
				23.01	-162		55.6	-269.892
				31.9	-304		5.82	-276.912
				31.6	-226		38.2	-186.91
				85.6	-10.3		6.06	-83.2799
				26.1	-202		11.3	-220.72
				32	-310		10.9	-397.7
				32	-426		11.2	-234.531
				22.2	-132		20.5	-467.181
				126.8	35		35.7	-215.458
				101.2	13.8		38.7	-211.348
				44	-64		21.9	-200.442
				95.6	-10.2		59	-56.148
				44.6	-11.2		39	34.92
				53.4	-17.2		73.4	-2.917
				23.8	-147		180	4.3064
				27.5	-39.8		52.6	13.0832
				25.6	-12.6		141.9	13.6432
				39.7	18		18	160.56
				28.7	-48		68	1.23
				48.9	10.9		58.5	72.664
				85.8	-3.5		61.3	8.74499
				131.7	37		68.7	-107.96
				17.8	-51.1		15.7	69.52
				62.01	11		35.9	-69.201
				113	15		35.9	61.5552
				85.7	10		29.6	309.372
							41.5	-223.984
							43.3	-134.495
							32.4	-95.968
							38.9	-85.671

## Sheet: S2 D
Sup Fig 1 D ePIC by delta I (derec I - rec I) on triangular current ramps across postnatal development
		Week 1	Week 2	Week 3
		71	-451.2	-291
		123	-273	-929
		81.9	-376	-326
		-317	-247	-522
		-181	-324	-382
		70	-423	-189
		-61	-411	-545
		-510	-95	-976
		-111	-260	-70.5
		-121	-220	-548
		-141	-149	-328
		-40	-267	-440
		-142	-116	-372
		-240	-190	-381
		-49	-601	-470
		-225	-532	-215
		72.8	-289	-236
		88.5	-281	-606
		-178	-119	-250
		-49	-196	-440
		-69	-224	-534
		-118	-418	-200
			-104	-113
		91.6	-297	-507
		30	-505	-347
		24.5	-235	-327
		184	-153	-508
			-156	102
			-232	25.5
			-222	8.5
			-100.6	32.3
			-294	63
			-116	5
			-308	15.8
			-273	22
			-421	-225.78
			-477	-387.912
			-204	-309.58
			-132	-84.924
			-329	-361.8
			-341	-218.646
			-186	-208.576
			-341	-152.608
			-428	-278.061
			-265	-245.208
			-365	-502.84
			-543	-256.24
			-265	-275.88
			-162	-269.892
			-304	-276.912
			-226	-186.91
			-10.3	-83.2799
			-202	-220.72
			-310	-397.7
			-426	-234.531
			-132	-467.181
			35	-215.458
			13.8	-211.348
			-64	-200.442
			-10.2	-56.148
			-11.2	34.92
			-17.2	-2.917
			-147	4.3064
			-39.8	13.0832
			-12.6	13.6432
			18	160.56
			-48	1.23
			10.9	72.664
			-3.5	8.74499
			37	-107.96
			-51.1	69.52
			11	-69.201
			15	61.5552
			10	309.372
				-223.984
				-134.495
				-95.968
				-85.671

## Sheet: S1 E
Supp Fig 1 E ePIC by delta I (derec I- rec I) on slow triangular current ramps by subtype across postnatal development
	Week 1			Week 2			Week 3
	Fast	Slow		Fast	Slow		Fast	Slow
	71	72.8		-423	-64		-291	102
	123	88.5		-411	-10.2		-929	25.5
	81.9	-178		-95	-11.2		-326	8.5
	-317	-49		-260	-17.2		-522	32.3
	-181	-69		-220	-147		-382	63
	70	-118		-149	-39.8		-189	5
	-61	91.6		-267	-12.6		-545	15.8
	-510	30		-116	18		-976	22
	-111	24.5		-190	-48		-275	-56.148
	-121	184		-601	10.9		-70.5	34.92
	-141			-532	-3.5		-548	-2.917
	-40			-289	37		-328	4.3064
	-142			-281	-51.1		-440	13.0832
	-240			-119	11		-372	13.6432
	-49			-196	15		-381	160.56
	-225			-224	10		-470	1.23
				-418			-215	72.664
				-104			-236	8.74499
				-297			-606	-107.96
				-505			-250	69.52
				-235			-440	-69.201
				-153			-534	61.5552
				-156			-200	309.372
				-232			-113	-223.984
				-222			-507	-134.495
				-100.6			-347	-95.968
				-294			-327	-85.671
				-116			-508
				-308			-225.78
				-273			-387.912
				-421			-309.58
				-477			-84.924
				-204			-361.8
				-132			-218.646
				-329			-208.576
				-341			-152.608
				-186			-278.061
				-341			-245.208
				-428			-502.84
				-265			-256.24
				-365			-275.88
				-543			-269.892
				-265			-276.912
				-162			-186.91
				-304			-83.2799
				-226			-220.72
				-10.3			-397.7
				-202			-234.531
				-310			-467.181
				-426			-215.458
							-211.348
							-200.442

## Sheet: S1 G
Supp Fig 1 G Firing hysteresis types in fast and slow motoneurons across three postnatal weeks
	Week 1			Week 2			Week 3
	Fast	Slow		Fast	Slow		Fast	Slow
	1	2		3	4		4	2		Summary Data
	2	2		4	3		4	1		Week 1	Fast				Slow
	4	3		4	2		4	1			Type	Count	proportion		Type	Count	proportion
	4	3		4	1		4	2			1	1	0.0625		1	1	0.111111
	2	3		4	1		4	1			2	3	0.1875		2	4	0.444444
	4	3		1	3		3	2			3	1	0.0625		3	4	0.444444
	4	2		4	1		4	1			4	11	0.6875		4	0	0
	4	1		4	1		4	2				16	1			9	1
	4	2		3	3		4	4
	4			3	1		4	2		Week 2
	3			4	1		4	3			Type	Count	proportion		Type	Count	proportion
	4			4	2		4	2			1	3	0.0545455		1	12	0.571429
	4			4	1		4	2			2	0	0		2	4	0.190476
	4			4	1		4	2			3	5	0.0909091		3	4	0.190476
	4			4	1		4	1			4	47	0.854545		4	1	0.047619
				4	2		4	1				55	1			21	1
				4	3		4	2
				4	1		3	1
				4	1		4	4		Week 3
				4	1		4	1			Type	Count	proportion		Type	Count	proportion
				4	2		4	4			1	0	0		1	8	0.296296
				4			4	2			2	0	0		2	11	0.407407
				4			3	2			3	7	0.134615		3	1	0.037037
				1			4	4			4	45	0.865385		4	7	0.259259
				4			4	4				52	1			27	1
				4			4	4
				4			4	4
				4			4
				4			4
				4			4
				4			4
				4			4
				4			4
				3			4
				4			4
				4			4
				4			4
				4			4
				4
				3			4
				4			4
				4			4
				4			4
				4			3
				4			4
				4			3
				4			4
				4			3
				4			4
				4			3
				4			4
				4			4
				1			4
				4
				4
