# Supplementary material for: Maturation of persistent and hyperpolarization-activated inward currents shapes the differential activation of motoneuron subtypes during postnatal development
Source: eLife. 2021 Nov 16;10:e71385. doi: 10.7554/eLife.71385 (PMC8641952; doi:10.7554/eLife.71385)
Supplement: Figure 4—source data 1. — PIC onset voltage (Figure 4H) and amplitude (Figure 4J) measured in voltage clamp during depolarizing voltage ramps. PIC amplitude and onset voltage measured in voltage clamp (Figure 4), and rheobase and recruitment gain (Figure 4O-R) in motoneuron subtypes before and after blockade of Nav1.6 or L-type calcium channels. [file elife-71385-fig4-data1.xlsx]

## Sheet: Fig 4 B
Figure 4B ePIC (pA)
	Week 1			Week 2			Week 3
	Fast	Slow		Fast	Slow		Fast	Slow
	76	228		571	1110		1046	308.4
	306	55.5		697	659		1312	518.9
	408	388.7		483			382	27.4
	115.2	25		360	262		747.3	31.2
	171	264		260	5		640	160.6
	267	65		295	82		1152	31.6
	159	91		319	221		307	-15
	175	178		641.1	47		947	-1
	8	84		1295	148		297.4	107.1
	-18	93		278	27		330	123
	34	307		196	533		520	36
	168	78		283	233		635	43.7
	381	96.6		456	142		449	32.6
	73	89		104	141		244.6	42.9
	198	92.9		197.5	59		430	23
	208	-32		508	134		872	104
	164	8		662	46.5		226	116
	89	131			42.2		268.4	81.6
	108	108			399		1400.4	171
	76	-15		349	81		826	86
	112	178		335	16		2386	152
	59	27		233	79		1147	144
	174			642			381	70
	130			260	56		144.9	40
	97			669	157		880	185
	154			919	65.5		1482	162
	98.8			220.1	127		495	250
	92			1251	268		860	109
	39			845	259		731
	439			341	57.1		145
	129			203	56.4		138
	136			525	91.6		318
	129			624	33.7		3071.5
				187	329		527
				259	64.2		238
				613			919
				653	34		778
				458	107.2		498
				1000	90		877.9
				424			364
				1855			320
				440			482
				192			137
				278			1651
				873			181
				513			1246
				243			644
				118			1829
				567			1036
				299			562
				484			280
				1057			380.3
				684			361
				575
				236
				186
				127
				416
				743
				477
				1416
				146
				691
				720
				1579
				101
				289
				398
				520
				280
				202
				809
				229
				777
				422
				252.3
				118
				513
				181
				360

## Sheet: Fig 4 C
Fig 4C Acceleration Onset (mV)
	Week 1			Week 2			Week 3
	Fast	Slow		Fast	Slow		Fast	Slow
	-45.9	-48.19		-52.6	-56.1		-53.8	-53.89
	-41.8	-48.9		-48.7	-56.6		-48.89	-49.56
	-50.57	-47.9		-54.6			-46.6	-53.62
	-46.2	-51.6		-52.03	-44.37		-57.86	-52.12
	-53.9	-50.17		-49.6	-51.6		-53.41	-55.6
	-49.3	-50.6		-51.3	-50.29		-51.33	-53.5
	-52.03	-47.7		-50.9	-47.6		-49.96	-52.28
	-47.02	-48.16		-54.08	-51.45		-44.89	-52.76
	-40.8	-48.2		-52.6	-55.8		-54.17	-55.2
	-49.9	-51.06		-49.8	-51.6		-50.96	-51.6
	-50.9	-50.3		-48.3	-49.1		-48.5	-56.4
	-48.7	-47.45		-53.07	-49.6		-48.4	-60.39
	-50.29	-46.7		-53.77	-54.1		-53.9	-55.7
	-45.1	-51.6		-48.71	-53.9		-49.59	-60.4
	-51.5	-42.2		-46.7	-50		-53.8	-55.9
	-50.14	-39.3		-54.02	-54.6		-52.2	-53.5
	-53.5	-38.15		-55.4	-50.02		-51.2	-49.07
	-47.4	-52.7		-54.37	-49.3		-54.17	-55.3
	-51.2	-50.6		-49.3	-49.77		-47.9	-53.6
	-51.8	-46.2		-49.3	-49.3		-50.3	-51.44
	-51.7	-56.5		-49.04	-57.3		-57.28	-57.8
	-39.8	-41.5		-50.8	-53.04		-52.4	-56.7
	-52.8			-52.34			-51.03	-47.03
	-48.3			-47.9	-56.3		-55.5	-58.63
	-46.3			-54.87	-49.5		-54.96	-53.6
	-52.6			-50.38	-51.4		-56.3	-55.02
	-53.7			-45.46	-50.23		-49.35	-54.46
	-42.8			-56.3	-44.19		-56.52	-56.7
	-51.03			-49.5	-48.6		-48.52
	-52.9			-50.51	-54.7		-55.7
	-50.17			-51.7	-49.35		-46.1
	-50.26			-53.6	-52.3		-53.8
	-50.45			-47.7	-57.2		-55.4
				-47.4	-53.44		-54.02
				-50.4	-55.02		-51.7
				-54.4			-59.05
				-50.8	-54.3		-54.9
				-52.9	-55.13		-52.19
				-54.5	-54.3		-47.79
				-51.5			-46.3
				-52.9			-53.9
				-51.6			-53.16
				-55.06			-35.9
				-52.7			-55.7
				-52.9			-52.4
				-54.8			-42.5
				-53.5			-52
				-50.51			-54.7
				-49.2			-50.3
				-52.4			-39.7
				-53.6			-50.69
				-53.16			-51.12
				-55.8			-48.8
				-51.12
				-53.6
				-51.79
				-48.03
				-51.7
				-51.24
				-53.4
				-51.7
				-53.4
				-54.2
				-53.4
				-56.5
				-47.24
				-51.9
				-52.25
				-52.06
				-51.9
				-50.9
				-51.6
				-50.75
				-51.3
				-52.9
				-55.2
				-57.2
				-47.9
				-52.7
				-48.8
				-54.8

## Sheet: Fig 4 D
Fig 4D Spike TH
	Week 1			Week 2			Week 3
	Fast	Slow		Fast	Slow		Fast	Slow
	-41.5	-40.25		-38.7	-33.94		-45.62	-46.95
	-33.91	-36.3		-31.7	-39.75		-43.677	-38.26
	-40.99	-38.5		-36.18			-45.46	-45.8
	-37.3	-38.2		-39.8	-34.5		-47.15	-44.13
	-41.6	-35.58		-38.18	-44.2		-45.12	-52.11
	-31.68	-39.5		-40.8	-42.5		-35.26	-47.77
	-42.76	-37.7		-39.6	-35.7		-39.74	-46.93
	-40.47	-34.4		-35.6	-42.3		-49.17	-42.05
	-35.6	-39.6		-35.3	-39.99		-46.06	-49.33
	-35.3	-34.3		-40.22	-41.6		-36.77	-46.23
	-44.8	-35.4		-35.6	-32.5		-40.507	-42.787
	-35	-30.24		-39.8	-43.15		-40.48
	-29	-38.6		-39.54	-40.7		-46.02	-49.5
	-38.7	-39.67		-37.7	-43.2		-43.67	-47.86
	-40.5	-34.9		-35.1	-46.2		-45.2	-44.82
	-38.7	-33.6		-35.48	-38.5		-41.4	-44.14
	-43.8	-34.33		-39.8	-39.4		-44.61	-51.26
	-34.12			-38.6	-38.25		-37.91	-44.6
	-38.5	-43.5		-35.68	-42.38		-44.16	-49.31
	-40.59	-34.56		-39.5	-41.53		-46	-48.44
	-38.5	-35.9		-36.13	-51.2		-47.8	-53.24
	-31.4	-33.1		-39.64	-42		-44.39	-48.93
	-39.8			-36.5			-43.17	-35.7
	-36.6			-35.98	-45.2		-51.89	-52.03
	-33.8			-39.49	-38.7		-45.97	-46.61
	-40.28			-34.5	-37.5		-41.76	-54.09
	-37.2			-33.9	-43.6		-42.16	-49.81
	-35.4			-42.978	-35.2		-45.1	-54.12
	-38.15			-36.4	-30.5		-39.82
	-38.02			-37.9	-48.46		-44.21
	-41.5			-39.25	-35.44		-39.14
	-39.22			-40.2	-37.9		-46.23
				-31.2	-46.6		-35.2
				-38.8	-39.8		-41.15
				-38.6	-48.4		-44.44
				-43.3	-42.8		-47.05
				-37.6	-43.15		-46.81
				-43.6	-43.6		-45.06
				-40.8	-40.96		-46.35
				-37.17			-51.36
				-37.14			-47.81
				-42.33			-49.01
				-45.12			-46.61
				-43.82			-44.79
				-39.25			-43.33
				-39.2			-34.46
				-41.7			-41.53
				-33.6			-44.444
				-37.5			-42.1
				-42.6			-40.76
				-39.6			-43.6
				-37.18			-44.25
				-43.19			-40.27
				-38.56
				-42.7
				-43.8
				-34.6
				-39.4
				-37.5
				-31.3
				-38.02
				-41.1
				-44.68
				-38.06
				-38.4
				-38.8
				-31.5
				-40.62
				-38.92
				-39.91
				-41.6
				-40.3
				-36.8
				-33.05
				-39.86
				-43.8
				-45.21
				-40.7
				-36.68
				-41.8
				-44.6

## Sheet: Fig 4 G
Fig 4F PIC Amplitude
	Week 2			Week 3
	Fast	Slow		Fast	Slow
	-267	-81.3		-563	-134.8
	-59.7	-341		-685.6	-107.6
	-428.8	-79.5		-453	-48.8
	-294	-126.9		-175.5	-308.8
	-1055	-100.5		-390.6	-385.9
	-564	-60.6		-364	-304.7
	-267	-130.2		-512	-334.7
	-214	-366		-410	-233.2
	-141	-295		-149	-225.5
	-392	-60.3		-949	-258
	-221	-152		-497.5	-257.2
	-497.5	-52		-232.5	-531.7
	-721.7	-80		-696.5	-680.4
	-425.9	-363.3		-593.8
	-456.7
	-129.2
	-206
	-593.8
	-184
	-65.9
	-219.1
	-562
	-532
	-459
	-688.5

## Sheet: Fig 4 H
Fig 4G PIC Onset Voltage
	Week 2			Week 3
	Fast	Slow		Fast	Slow
	-54.44	-51.51		-53.39	-64.136
	-53.2	-55.74		-59.039	-52.507
	-47.835	-67.03		-46.03	-55.12
	-61.8	-59.964		-53.1409	-59.4
	-49.82	-58.47		-46.5	-58.09
	-51.04	-52.95		-42.46	-62.01
	-52.5	-64.46		-44.22	-56.91
	-46.96	-59.964		-53.22	-63.671
	-45.07	-57.2		-48.22	-62.72
	-53.862	-53.2		-53.171	-63.77
	-49.308	-57.6		-46.93	-49.141
	-51.329	-58.9		-48.565	-53.056
	-59.76	-62.84		-45.55	-55.704
	-44.618	-56.5		-45.97
	-46.838
	-48
	-51.44
	-52.9
	-52.5
	-51.79
	-39.93
	-54.21
	-50.3
	-45.86
	-50.471

## Sheet: Fig 4 J
Figure 4 J PIC amplitude before and after blockade of NaV1.6 channels
PIC Amplitude	Delayed Firing MNs			Immediate Firing MNs
	BL	TTX		BL	TTX
	-459	-203		-130.2	-6.7
	-401	-168		-581	-294
	-582	-530		-35	-15
	-691	-306		-341	-211
	-395	-183		-273	-81.6
	-78.5	-117		-135	-34.6
	-480.5	-344		-127	-24
	-158	-102		-95.2	-4.5
	-40	-42		-130.3	-85.3
	-688.5	-159		-97	-76
	-203	-154		-140	-126
	-744	-208		-183	-17.6
	-405	-498
	-239	-51.4
	-448	-297
	-424	-350
	-937	-1030
	-828	-659
	-645	-453

## Sheet: Fig 4 K
Figure 4 J PIC amplitude before and after blockade of L-type calcium channels
	Delayed Firing MNs			Immediate Firing MNs
	BL	Nif		BL	Nif
	-564	-368		-104	-68.8
	-214	-178.7		-60.8	-72.8
	-141	-141		-92	-122
	-100.5	-138		-95	-120
	-221	-125.5		-42.2	-32.7
	-216	-121		-81	-80.5
	-497.5	-259
	-721.7	-460
	-224.9	-225
	-129.2	-110
	-206	-176.6
	-103	-99.6
	-219.1	-140.6
	-535.5	-588

## Sheet: Fig 4 L
Figure 4 L PIC onset voltage before and after blockade of NaV1.6 channels
Delayed Firing MNs			Immediate Firing MNs
BL	TTX		BL	TTX
-45.86	-38.37		-64.46	-54.6
-50.7	-43.59		-55.19	-55.59
-49.11	-38.8		-66.5	-65.3
-50.471	-54.44		-54	-61.01
-48.3	-42.8		-75.8	-74.4
-50.18	-40.97		-59.4	-73.44
-57.12	-50.8		-64.5	-63.4
-56.9	-53.5		-55.48	-60.8
-52.3	-48.4		-58.8	-61.12
-68.93	-43.82		-48.2	-52.5
-49.66	-40.871		-49.5	-51.45
-53.5	-47.1		-69	-66.1
-46.26	-44.54
-51.3	-38.78
-47.2	-47.1
-53.977	-49.15
-57.98	-54.29
-52.67	-48.77
-47.58	-49.426

## Sheet: Fig 4 M
Figure 4 M PIC Onset Voltage before and after blockade of L-type Calcium Channels
	Delayed Firing MNs			Immediate Firing MNs
	BL	Nif		BL	Nif
	-51.04	-49.73		-62.53	-52.35
	-46.96	-42.055		-48.65	-62.98
	-45.07	-47.807		-56.6	-53.4
	-58.47	-57.44		-52.86	-56.63
	-49.308	-42.94		-59.043	-59.71
	-54.668	-66.07		-59.24	-55.8
	-51.329	-54.67
	-59.74	-67.103
	-46.838	-50.553
	-48	-58.01
	-51.44	-55.82
	-51.79	-65.73
	-39.93	-46.38
	-51.275	-36.48

## Sheet: Fig 4 O
Fig 4 M Rheobase current before and after blockade of NaV1.6
	Delayed			Immediate
	BL	TTX		BL	TTX
	666	959		130	229
	524	949		104	179
	976	1300		189	265
	224	568		670	460
	475	720		138.8	120
	990	945		132.4	75.5
	1229	1745		110.6	317
	818	1188		156	452
	542	742		237	177
	1108	1253		159.8	172
	627	1019		326	271
	1768	2402		91	108
	1409	1960
	1455	2021
	1222	1495
	312	667
	377	673
	726	1136
	897	1303

[truncated: 3 more sheets: Fig 4P, Figure 4Q, Fig 4R]
