# Supplementary material for: Maturation of persistent and hyperpolarization-activated inward currents shapes the differential activation of motoneuron subtypes during postnatal development
Source: eLife. 2021 Nov 16;10:e71385. doi: 10.7554/eLife.71385 (PMC8641952; doi:10.7554/eLife.71385)
Supplement: Figure 5—source data 1. — Ih measured in voltage clamp before and after application of ZD7288 (Figure 5I-J). [file elife-71385-fig5-data1.xlsx]

## Sheet: Fig 5 B
Fig 5 B change in conductance during sag (delta gSag) (nS)
	Week 1			Week 2			Week 3
	Fast	Slow		Fast	Slow		Fast	Slow
	-3.32336	25.2448		-3.31837	5.2352		11.4081	3.52976
	-5.50273	3.86796		6.47341	3.89278		42.1526	28.7151
	5.64008	1.60604		8.4819	13.4829		49.8144	9.74676
	2.98209	5.20792		2.83873	-22.325		22.2761	8.84178
	3.35552	4.56621		13.2287	5.00575		-25.2525	4.51327
	1.88457	4.47981		6.47549	8.60298		27.9169	8.54832
	1.99766	0.34153		-1.63726	-9.12187		14.841	-2.55584
	3.07957	1.40056		6.6069	15.8684		59.0169	11.5664
	0.895968	1.16881		13.1107	3.78628			5.80088
	7.47372	0.311064		-7.08328	27.7515		21.5802	16.0899
	4.92242	12.3576		3.09785	7.95455		36.2069	8.26044
	7.78976	6.33487		2.10447	5.48292		47.0453	1.93565
	7.15922	2.55412		3.60048	15.2584		53.5948	14.2981
	1.60054	4.07989		0.656901	19.0372		8.29409	4.54971
	5.4878	5.43589		5.78947	-13.8554		1.9305	0.367918
	5.43896	5.88724		11.0193	0.999711		59.1675	4.5018
	6.99301	-2.21886		5.67875	0.979258		7.64651	4.14065
	0.36036	2.80783		5.65527	49.0876		-8.47762	6.10392
	6.26443	-0.42088		263.396	-28.7166		121.116	3.98522
	4.38791	3.01366		5.64262	-5.54929		58.0678	19.1508
	3.43337	2.61736		2.959	5.97065		105.838	6.7135
	3.17938	2.09116		2.12159	2.64636		37.5389	14.0239
	9.25266	5.08832		-10.0686	0.655396		58.33	6.23557
	0.669564	4.85625		7.78629	15.5641		24.5367	0.493225
	4.06112			10.538	0.989006		89.6323	-0.99772
	1.485			3.94369	28.4251		129.092	0.263638
	4.03986			5.01413	22.6433		96.8202	6.0503
	1.03646			-41.6281	-12.5774		66.3957	6.54985
	3.8345			21.6471	1.10797		7.386
	0.568789			-13.5245	0.210154		0.021595
	4.91725			17.0357	11.953		1.56546
	12.8453			1.18076	-3.96486		4.98565
	-0.48704			-1.27979	44.6346
				2.76806	-14.6662
				3.85795	7.10956
				12.95	-4.88979
				12.8931	6.10722
				-3.68654	-3.69354
				24.4158	23.0313
				2.55685
				-5.11851
				9.86561
				17.3307
				4.64481
				-2.6455
				20.3503
				8.6323
				25.4308
				6.42916
				-0.44016
				16.5756
				17.3993
				17.9398
				2.72617
				2.48793
				3.63436
				2.918
				0.218938
				-30.3264
				-37.8919
				2.1441
				32.4941
				33.5633
				18.1297
				13.7798
				28.6089
				8.34721
				3.3473
				0.853039
				32.7169
				6.10501
				1.84535
				43.2342
				4.58917
				2.06864
				13.92
				8.29011
				2.03329
				18.4873
				6.25193
				9.10098
				28.611
				8.24818
				16.9651
				50.7911
				34.0115
				6.00854
				-0.63745
				10.7125
				-0.81138
				95.6018
				11.5581
				74.9264
				7.85041
				-10.2977
				6.29816
				4.2965
				0.6888
				4.5632
				14.7023

## Sheet: Fig 5C
Fig 5 C Sag potentials in Fast MNs
	Week 1					Week 2						Week 3
	-100	-90	-80	-70		-100	-90	-80	-70			-100	-90	-80	-70
	4.30298	2.44141	1.12915	0.518799				0.793457	-0.21362			14.3433	12.2681	6.53076	1.43433
	8.14819	7.56836	2.28882	0.244141				1.46484	1.0376			14.9231	12.085	7.56836	4.42505
		1.89209	0.274658	-0.213623					1.12915			12.1155	11.6882	8.05664	1.77002
	7.23267	4.45557	1.34277	0.488281			7.72095	4.48608	0.396729			15.7776	11.5662	7.17163	1.31226
		1.2207	0.396728	-0.823975					1.89209			20.91	16.479	9.857	4.36
		4.82178		-0.152588					0.488281			23.93	17.61	10.59	3.32
	4.18091	4.02832	1.2207	1.00708					1.64795			23.22	18.92	11.35	5.24
	3.41797	1.95312	1.19019	0.183106			7.53784	2.7771	0.701904			19.17	16.42	10.34	4.85
		5.06592	1.98364	0.518799			5.43213	0.976563	0.946045			19.84	16.17	11.05	5.59
							4.57764	2.38037	0.213623			20.844	16.693	8.73	3.5
						7.87354	6.43921	2.2583	0.610352			9.92	7.02	5.23	2.13
						6.4	3.63159	0.946045	0.976563			21.79	18.04	12.18	4.06
							5.88989	3.75366	0.427246			21.35	16.29	10.315	3.906
						10.76	9.85	5.43	1.46			11.566	11.36	7.66	3.3
						10.7	4.9	2.1	0.037			17.55	13.641	8.697	3.61
						4.54712	3.26538	0.88501	0.091553			20.39	16.11	9.826	4.211
						8.05664	7.38525	5.21851	1.61743			19.87	16.57	10.44	3.88
												23.47	14.71	9.46	3.66
												24.57	18.92	13.4	3.45
												15.02	9.31	3.17	1.46

## Sheet: Fig 5D
Fig 5 D Sag potentials in Slow MNs
	Week 1					Week 2						Week 3
	-100	-90	-80	-70		-100	-90	-80	-70			-100	-90	-80	-70
	6.56128	5.46265	1.86157	-0.0305176			11.9019	3.41797	0.213623			12.1155	11.6882	8.05664	1.77002
	5.06592	3.84522	-0.366211	-0.213623		6.68335	3.02124		-0.15259			3.90625	4.73022	2.34985
	9.79614	4.24194	2.22778	0.549316			7.53784	2.7771	0.701904					-0.06104	0.946045
	7.1295	5.76782	3.78418	1.49536		2.7	1.12	1.52	0.03			5.92	4.02	2.1	0.3357
						1.64795	0.854492	-0.97656	-0.94604			10.6	10.04	3.87	1.67
						7.20215	6.71387	2.65503	-0.24414			7.95	7.84	3.21	1.31
						3.23486	1.15967	0.305176	0.488281			9.213	9.49	5.52	1.65
						1.7	0.9	0.6	0.3

## Sheet: Fig 5F
Fig 5 F Ih amplitude measured at -70 mV
	W2		W3
	Del	Imm	Del	Imm
	-39.06	-25.6348	-208.13	-14.6
	-0.61035	-20.1416	-346.1	20.752
	-17.0898	-22.583	-50	-15.3
	-14.6484	50.6592	-170	-6.7
	70.8008	-18.3105	-258.4	-15.9
	-113.53	-23.1934	-163.6	7.32422
	-57.373	-11.5967	-49.4385	-13.4
	-26.8555	-42.1143	-49.4385	23.1934
	-21.3623	4.27246	-275.879	9.15527
	4.27246	-116.577	-47.6074	-15.6
	-4.88281	1.2	-7.32422	-13.4
	-3.05176	-54.3213	-33.5693	-7.3
	-80.5664		-62.9	3.1
	-43.335		-213	9.76562
	-34.79		-29.3	-26.2
			-139	7.3
			-144	3.1
			-11.6	-10.4
			-9.2	18.3

## Sheet: Fig 5 G
Fig 5G Ih amplitude measured at -110 mV
	W2		W3
	Del	Imm	Del	Imm
	-67.749	-50.0488	-958.252	-94
	-433.35	-81.1768	-1438.6	-445.557
	-405.273	-75.0732	-1107.2	-249.6
	-215.454	-633.545	-1394.5	-176.4
	-317.993	-498.047	-1633.7	-640.3
	-1472.17	-104.37	-1351.9	3.05176
	-1437.38	-213.013	-1378.78	-467.5
	-1244.51	-672.607	-1378.78	-529.175
	-640.869	-705.566	-2749.63	-68.9697
	-427.856	-902.71	-863.648	-240.5
	-383.911	-524.3	-869.751	-197.8
	-1566.77	-921.021	-1143.8	-330.2
	-1495.97			-200.8
	-1038.82		-1228	-73.8525
	-490.723		-516	-545.7
			-1354	-427.2
			-1333	-92.8
			-131.8	-564
			-333	-393

## Sheet: Fig 5 I
Figure 5I Ih measured at -70 mV before and after blockade of HCN channels
	Del		Imm
	BL	ZD	BL	ZD
	-156	22.583	-4.9	7.93457
			7.32422
	-275.879	28.0762	23.1934	12.207
	-58	-12.8174	9.15527	10.376
	-14.6		9.76562	-0.244141
	-47.6	18.3105	7.3	10.4
	-67.9	3.7	3.1	9.8
	3.7	18.9	-10.4	12.8
	6.4	22.6	18.3	11.6
	-213	-7.8
	-144	19.5
	-11.6	31
	-9.2	9.8

## Sheet: Fig 5J
Fig 5J Ih measured at -110 mV before and after blockade of HCN channels
	Del		Imm
	BL	ZD	BL	ZD
	-1530	-169.678	-4.9	43.335
			7.32422
	-2749.63	-166.626	23.1934	33.5693
	-867.3	21.3623	9.15527	34.1797
	-869.751		9.76562	0.610352
	-1143.8	-8.54492	7.3	-3.1
		-54.3	3.1	25.6
	-51	61	-10.4	25
	-458.4	19.5	18.3	31
	-1228	-227.1
	-1333	-12.8
	-131.8	-13.4
	-333	-8.5
