# Supplementary material for: Maturation of persistent and hyperpolarization-activated inward currents shapes the differential activation of motoneuron subtypes during postnatal development
Source: eLife. 2021 Nov 16;10:e71385. doi: 10.7554/eLife.71385 (PMC8641952; doi:10.7554/eLife.71385)
Supplement: Figure 6—source data 1. [file elife-71385-fig6-data1.xlsx]

## Sheet: Fig 6B
Figure 6 B ZD sensitive sag potentials at RMP in delayed but not immediate firing MNs
	Delayed		Immediate
	BL	ZD	BL	ZD
	1.65	-1.22	1.53	-0.61
	0.43	-0.18	-1.56	-0.73
	2.72	0.43	0.12	-3.7
	1.34	-0.37	0.09	-0.61
	3.69	-0.46	-1.37	-1.77
	0.76	-0.46	-0.4	-0.31
	2.87	0.31	0.2	-0.15
	0.12	-0.06	0.52	-0.52
	0.67	-0.82	2.81	-0.31
	1.4	0.09
	2.04	0.34
	0.34	-0.49
	0.82	-0.67

## Sheet: Fig 6D
Fig 6D resting membrane potential before and after blockade of Ih
		Fast			Slow
		BL	ZD		BL	ZD
		-67	-80		-61	-72
		-65	-74		-70	-77
		-51	-62		-63	-71
		-61	-72		-71	-73
		-76	-84		-76	-78
		-67	-79		-70	-71.2
		-71	-78		-80	-81.2
		-78	-78		-67	-72.5
		-70	-83		-78	-83
		-60	-75
		-65	-78
		-64	-75
		-67	-75

## Sheet: Fig 6 E
Fig 6E change in resting membrane potential after blockade of Ih
		Fast	Slow
		-13	-11
		-9	-7
		-11	-8
		-11	-2
		-8	-2
		-12	-1.2
		-7	-1.2
		0	-5.5
		-13	-5
		-15
		-13
		-11
		-8

## Sheet: Fig 6 G
Figure 6G Rec I before and after blockade of Ih
		Fast			Slow
		BL	ZD		BL	ZD
		1137	885		302	147.3
		820	522		60.2	59.4
		2929	1650		116	90.8
		973	532		33.2	26.5
		1115	765		250	236
		1163	584		435	427.1
		3260	1079		430	369.5
		661.4	651		530	433
		551.2	259		444.5	347
		2833	1555
		1668	847
		820	219
		742	403

## Sheet: Fig 6 H
Fig 6H Recruitment Gain Cumulative proportion histograms of Rec current before and after blockade of Ih
	Rec I	BL	ZD
	50	9.09091	9.09091
	100	13.6364	13.6364
	150	13.6364	18.1818
	200	13.6364	22.7273
	250	18.1818	31.8182
	300	22.7273	31.8182
	350	22.7273	40.9091
	400	22.7273	45.4545
	450	36.3636	54.5455
	500	36.3636	59.0909
	550	45.4545	63.6364
	600	45.4545	68.1818
	650	50	72.7273
	700	50	72.7273
	750	54.5455	77.2727
	800	63.6364	77.2727
	850	63.6364	81.8182
	900	63.6364	86.3636
	950	68.1818	86.3636
	1000	68.1818	86.3636
	1050	68.1818	86.3636
	1100	72.7273	90.9091
	1150	81.8182	90.9091
	1200	81.8182	90.9091
	1250	81.8182	90.9091
	1300	81.8182	90.9091
	1350	81.8182	90.9091
	1400	81.8182	90.9091
	1450	81.8182	90.9091
	1500	81.8182	90.9091
	1550	81.8182	95.4545
	1600	81.8182	95.4545
	1650	86.3636	100
	1700	86.3636	100
	1750	86.3636	100
	1800	86.3636	100
	1850	86.3636	100
	1900	86.3636	100
	1950	86.3636	100
	2000	86.3636	100
	2050	86.3636	100
	2100	86.3636	100
	2150	86.3636	100
	2200	86.3636	100
	2250	86.3636	100
	2300	86.3636	100
	2350	86.3636	100
	2400	86.3636	100
	2450	86.3636	100
	2500	86.3636	100
	2550	86.3636	100
	2600	86.3636	100
	2650	86.3636	100
	2700	86.3636	100
	2750	86.3636	100
	2800	86.3636	100
	2850	90.9091	100
	2900	90.9091	100
	2950	95.4545	100
	3000	95.4545	100
	3050	95.4545	100
	3100	95.4545	100
	3150	95.4545	100
	3200	95.4545	100
	3250	100	100
