# Supplementary material for: Maturation of persistent and hyperpolarization-activated inward currents shapes the differential activation of motoneuron subtypes during postnatal development
Source: eLife. 2021 Nov 16;10:e71385. doi: 10.7554/eLife.71385 (PMC8641952; doi:10.7554/eLife.71385)
Supplement: Source data 1. [file elife-71385-supp4.xlsx]

## Sheet: W3
0+										Rec Ramp							MN Type			Repetitive Firing						SubTH V Trajectory						PIC Ramp Rec-Derec/Firing Rate Hysteresis									H-Current				PIC
Date	Cell no	Age (PX)	Sex (M:1, F:2)	Segment (1,2,3)	Vm	Rin SS	Rin Pass	Tau	CapCalc	Rheobase ramp	spike TH Ramp	Spike Amp	Spike RT	Spike HW	AHP amp	AHP HW	Rb 5s step	RF latency	Fast (1) Slow (2) trans (3)	Min FR	FR 2*Rb	Max FR	Offset Current	Current range	SPR Slope	Vtakeoff	dV	Ito	Itheoretical	Itheo-Iactual	Rm Passive	Ionset	Ioffset	Delta I	Freq onset	Freq offset	Dfreq	Type	Inc Slope	Dec Slope	Ih -70	Ih dens -70	Ih -110	Ih dens -110	Onset V	Peak V	I Max	I Dens
2027-05-01	1	14	1	1	-57	43.9	51.95	6.8	130.895	285	-41.99	59.035	0.5	0.570139	-3.42033	24.7106	300	0.03	2	12.256	61.3497	116.279	1464	1161.73	0.160234	-53.89	11.9	212	593.4	308.4	28.8208	215.424	584.016	368.592	6.52742	8.23723	1.70982	2	0.115655	0.101641
	2	14	1	1	-64	10.4	11.8	8.2	694.915	878	-39.46	78.1112	0.4	0.454196	-4.01789	24.0731	920	4.559	1	12.143	32.6797	48.3092	3539.94	2631.21	0.0820903	-53.8	14.34	710	1924	1046	8.73239	1399.75	1110.34	-289.408	8.96057	7.93651	-1.02407	4	0.0573191	0.0255624
11.09.2019	1	15	1	3	-64	5.87	7.8	6.3	807.692	2471	-36.01	76.9701	0.45	0.455438	-3.68589	22.2082	2550	4.6	1	7.68894	44.0529	46.083	7827.94	5150.35	0.23581	-48.89	12.88	1826	3783	1312	6.08434	3180	2413.6	-766.4	13.3333	17.1527	3.81933	4	0.0144102	0.00946596
	2	15	1	3	-69	10.9	23.85	2.1	88.0503	891	-40.53	64.3131	0.388889	0.445155	-5.99767	21.9625	1290	3.77	1	10.776	43.4783	71.9424	4798.63	3827.7	0.0986709	-46.6	6.07	994	1559	382	13.4809	1316.84	994.5	-322.344	14.5138	7.23066	-7.28313	4	0.0591772	0.0385144
	3	15	1	3	-68	8.74	10.8533	6.9	635.749	259	-47.23	70.7731	0.4	0.392764	-12.4458	26.7433	400	4.03	1	9.38085	22.3214	57.1429	6605.63	6235.88	0.0921684	-57.86	10.63	309.6	1137.3	747.3	6.91214	905.376	579.328	-326.048	12.9534	13.6612	0.707834	4	0.0263663	0.0154316
	4	15	1	3	-68	25.2	15.4	5.3	344.156	564	-42.6	78.451	0.4	0.482935	-8.42185	28.8695	680	4.337	1	6.77551	24.6305	38.7597	5372.48	4728.83	0.0951996	-53.41	10.81	420	1204	640	15.6905	909.59	527.142	-382.448	8.81057	5.49753	-3.31305	4	0.0534959	0.0225721
	5	15	1	3	-65	11.9	17.82	3.8	213.244	1250	-35.6	62.3494	0.43	0.509193	-5.19103	32.8819	1800	3.54	1	6.20666	28.2486	32.8947	4098.41	2767.3	0.043818	-51.33	15.73	864	2402	1152	10.0347	2534.76	2343.3	-191.46	8.8574	7.40741	-1.44999	3	0.0292695	0.0175641
12.09.2019	2	16	1	3	-60	16.6	31.72	10.2	321.564	797	-34.8	69.1992	0.55	0.44872	-3.58321	31.4965	800	0.0249	2	7.87719	34.6021	40.6504	2743.57	1906.34	0.0851462	-49.56	14.76	568.8	1315.9	518.9	18.3544	918.504	944.88	26.376	8.80282	8.99281	0.189988	1	0.0451232	0.0468773
	3	16	1	3	-68	19.6	27.64	6.6	238.784	438	-39.5	70.9381	0.48	0.584167	-9.02835	51.2288	400	3.61	1	6.67035	22.8833	51.2821	4364.56	3594.82	0.0518181	-49.96	10.46	343	745	307	29.2711	772.296	214.032	-558.264	7.14286	4.81928	-2.32358	4	0.0235624	0.0108044
	4	16	1	3	-62	67.8	199.9	44.1	220.61	33	-43.4	70.1103	0.42	0.43068	-8.63451	78.8842	10	0.71	2	8.40119	10.929	96.1538	1586.27	1536.01	0.13264	-53.62	10.22	24.9	60.4	27.4	256.225	13.1136	12.8496	-0.264006	3.02939	1.74795	-1.28144	1	0.12867	0.138943
25.09.2019	1	15	1	3	-67	6.9	11.64	4.5	386.598	2022	-31.39	74.4355	0.41	0.429054	-2.93557	14.5972	2400	3.93	1	15.2379	52.6316	62.5	6078.68	3438.54	0.115793	-44.89	13.5	1594	2969	947	9.4793	2885.28	1908.72	-976.56	18.6567	8.82613	-9.83059	4	0.0204995	0.0124528
27.09.2019	1	17	2	3	-58	61.8	136.25	23.1	169.541	122	-40.57	72.6578	0.51	0.508929	-8.06069	42.4649	80	0.31	2	11.4457	24.3902	93.4579	1276.24	1137.11	0.120726	-52.12	11.55	73	153.2	31.2	107.945	120.375	153.15	32.775	5.06073	6.88231	1.82158	2	0.139923	0.157605
01.11.2019	1	15	2	3	-65		39.2381	12.7	323.665	312.6	-41.38	83.4318	0.51	0.708169	-7.34804	70.2978	200	3.35	1	6.6448	17.6991	34.3643	2360.36	2047.69	0.0481929	-54.17	12.79	209	610	297.4	27.8947	366.418	95.03	-271.388	4.95786	3.82848	-1.12937	4	0.0379285	0.0192745					-53.39	-35.18	-563	-1.73945
	2	15	2	3	-64	22.1	42.25	7.6	179.882	450	-35.6	74.685	0.46	0.52158	-3.59829	42.156	429	3.56	1	9.27983	37.594	52.6316	1585.62	1135.93	0.107725	-50.96	15.36	300	780	330	30.1333	462.72	393.04	-69.68	8.12348	5.82072	-2.30276	4	0.0511837	0.0442912					-59.039	-22.341	-685.6	-3.81139
09.11.2019	1	14	1	3	-64	11.6	20	5.5	275	877	-35.9	69.6116	0.57	0.724676	-4.60522	42.6632	880	3.05	1	5.38737	20.0401	33.7838	3537.66	2862.23	0.0528463	-48.5	12.6	671	1397	520	17.1386	1312.61	938.315	-374.29	7.74593	6.80272	-0.943213	4	0.0279356	0.0133898
	2	14	1	3	-60	10.5	20.75	7.2	346.988	854	-35.35	72.6333	0.5	0.64898	-4.73272	40.5138	900	2.65	1	7.57649	29.2398	40.8163	3326.98	2449.26	0.0669309	-48.4	13.05	653.6	1489	635	17.7479	1133.49	873.596	-259.896	9.3633	6.5189	-2.84439	4	0.0270561	0.0181947					-46.03	-35.34	-453	-1.30552
	3	14	1	3	-67	10.2	22.5	8.3	368.889	510	-46.5	81.6859	0.49	0.64892	-6.62693	48.8869	350	3.94	1	6.29949	20.0401	33.3333	3642.09	3107.91	0.0429405	-53.9	7.4	413	959	449	14.77	784.68	350.25	-434.43	6.7659	5.39665	-1.36925	4	0.018649	0.0114466
	4	14	1	3	-64	27.9	36.3	13.4	369.146	465	-39.7	76.1285	0.65	0.723146	-7.34327	73.6933	300	3.88	1	5.24139	17.5131	47.1698	2668.6	2179.43	0.0392536	-49.59	9.89	357.4	709.6	244.6	29.127	540.14	162.34	-377.8	5.08388	3.47464	-1.60925	4	0.0244173	0.0133401					-53.1409	-32.37	-175.5	-0.475422
10.11.2019	1	15	2	3	-66	28	29.6	11	371.622	273	-43.67	82.8221	0.41	0.5772	-9.01202	62.3775	309	2.45	1	6.17705	13.7363	40.8163	3699.81	3402.78	0.0402516	-53.8	10.13	299	859	430	20.7358	476.7	90.2801	-386.42	6.15764	5.68828	-0.469354	4	0.0227422	0.0125056					-46.5	-21.2	-390.6	-1.05107
	2	15	2	3	-65	8.5	17.1	8.1	473.684	883	-38.7	77.722	0.44	0.569564	-6.80121	57.6468	600	4.07	1	6.17381	28.9017	39.8406	3142.08	2235.54	0.0475636	-52.2	13.5	639	1755	872	12.2066	1018.26	545.256	-473.004	5.76701	5.50055	-0.266462	4	0.0216184	0.0126439					-42.46	-35.52	-364	-0.768444
	3	15	2	3	-67	40.3	58.25	17.9	307.296	285	-37.54	82.5434	0.5	0.676254	-6.49911	65.2991	180	3.86	1	6.23922	15.083	60.6061	2020.32	1758.3	0.05151	-51.2	13.66	192	511	226	45.8333	290.528	-28.8159	-319.344	5.5371	2.64901	-2.88809	4	-0.00531361	0.0211594
13.11.2019	1	18	2	3	-66	19.4	16.66	4.3	258.103	1513.6	-29.7	63.3769	0.47	0.51039	-4.56741	35.3856	1650	4.5	1	6.20722	34.7222	50.2513	4125.92	2549.81	0.0349673	-54.17	24.47	886	1782	268.4	6.58014	2046.15	1783.11	-263.036	11.0619	7.93021	-3.13173	3	0.0172207	0.0148986
	2	18	2	3	-65	4.76	11.24	6.4	569.395	1433.6	-47.39	73.698	0.35	0.432298	-5.52883	39.2302	1500	4.52	1	4.82675	24.6305	31.4465	4060.57	2564.21	0.0379098	-47.9	15.56	1337.5	2834	1400.4	9.04673	2105.74	1473.36	-632.38	6.77048	6.18047	-0.590011	4	0.0161982	0.01073
	3	18	2	3	-67	0.578	8.7	6.2	712.644	2244	-33.37	68.8882	0.35	0.451434	-3.98064	34.9006	1251	3.43	1	6.49175	22.9358	57.4713	3198.51	2257.41	0.0296543	-50.3	13.04	668.7	1742	826	14.5058	2605.36	2309.2	-296.16	8.03213	9.61539	1.58326	4	0.0161682	0.0120675
14.11.2019	1	19	2	3	-67	0.057	10.62	5	470.81	1768	-43.06	71.5061	0.34	0.375289	-5.0332	22.4829	2000	4.61	1	9.38699	38.7597	52.9101	7077.83	5280.87	0.122683	-57.28	14.22	1015	4154	2386	2.6798	2064.54	1659.78	-404.76	14.0449	17.0068	2.96186	4	0.0188861	0.0151083
20.11.2019	1	17	2	3	-71	30.3	35.1	4.1	116.809	195	-49.8	90.318	0.39	0.447098	-5.07001	26.7295	270	0.0057	2	4.22156	14.0056	151.515	1723.94	1529.01	0.0666687	-55.6	5.8	142.6	355.6	160.6	30.8555	251.7	311.736	60.036	3.59324	3.83289	0.239641	1	0.0631938	0.0609159	-14.6	-0.125862	-94	-0.810345
	2	17	2	3	-64	8.6	12.7	6.5	511.811	1200	-41.24	68.7278	0.37	0.41359	-4.46787	29.2276	1400	4.123	1	8.58915	31.4465	69.4444	5867.19	4603.14	0.0883246	-52.4	11.16	838	2347	1147	9.06921	1652.7	1117.5	-535.2	9.09091	8.34725	-0.743664	4	0.0200998	0.011975					-44.22	-25.55	-512	-1.00037
21.11.2019	1	18	1	3	-61	60.1	123.6	21.4	173.139	301	-46.3	62.9555	0.324	0.36028	-3.32455	78.3313	160	0.0124	2	10.9328	26.2467	150.376	1573.83	1457.72	0.218069	-53.5	7.2	216	332.6	31.6	30.0926	223.386	449.454	226.068	11.9904	10.101	-1.8894	2	0.188599	0.178527	20.752	0.119953	-445.557	-2.57547
	2	18	1	3	-57	67.2	57.35	17.8	310.375	115	-45.48	58.783	0.436	0.385244	-5.11122	41.2053			2	8.61579	46.4037	129.87	3554.69	3040.84	0.158749	-52.28	6.8	60.7	99.1	-15.9	127.183	494.656	510.544	15.888	8.46382	6.42467	-2.03915	1	0.0949517	0.107861	-208.13	-0.671387	-958.252	-3.09114
23.11.2019	1	20	2	3	-65	9.7	22.34	6.8	304.387	723	-41.5	69.2686	0.556	0.668689	-3.05817	46.5929	550	4.05	1	4.75511	20.1207	62.1118	2906.16	2151.1	0.0494462	-51.03	9.53	514.3	1104	381	17.4412	2145.51	1962.54	-182.97	5.69476	4.85555	-0.839213	3	0.0158298	0.0109662	-346.1	-1.13849	-1438.6	-4.73224
	2	20	2	3	-68	23.4	54.95	19	345.769	172	-47.2	89.0177	0.648	0.747738	-11.8232	94.9066	110	3.5	1	4.57174	8.20008	37.037	2145.27	1940.86	0.024698	-55.5	8.3	140.9	316.9	144.9	31.9375	185.098	71.3592	-113.738	3.25098	3.13038	-0.120595	4	0.0294463	0.0146795	-50	-0.144509	-1107.2	-3.2	-53.22	-37.5	-410	-1.18576
	3	20	2	3	-65	5.8	12.08	7.2	596.026	465	-45.5	77.2539	0.484444	0.505804	-7.68556	43.2786	800	3.15	1	5.46085	15.3492	37.594	3092.59	2595.61	0.0360093	-54.96	9.46	359.1	1345	880	14.0351	1451.75	945.675	-506.075	7.13521	6.75676	-0.378456	4	0.0154572	0.0103619	-170	-0.285235	-1394.5	-2.33977
	4	20	2	3	-64	6.9	63.15	5.4	85.5107	598	-44.7	70.9409	0.38	0.429659	-7.40887	41.3052	1000	2.5	1	4.54809	15.2905	49.7512	3636.41	3006.75	0.0287074	-56.3	11.6	465.1	2080	1482	7.95528	1686.9	1337.57	-349.325	7.35294	6.84932	-0.503626	4	0.0186859	0.0123039	-258.4	-3.04	-1633.7	-19.22
	5	20	2	3	-65	9.3	93.4	5.9	63.1692	667	-40.3	67.8283	0.406	0.527206	-8.03826	46.5674	950	2.97	1	5.40488	19.5312	56.338	3052.92	2354.57	0.0359582	-49.35	9.05	553.3	1162	495	19.2481	1100.97	712.047	-388.92	6.84229	4.41112	-2.43117	4	0.0183075	0.0131283	-163.6	-2.59683	-1351.9	-21.4587	-48.22	-28.16	-149.6	-2.36824
2027-11-01	1	17	1	3	-57	49.5	115.8	14.7	126.943	119	-40.5	57.2325	0.284	0.361133	-3.44135	53.1318	130	0.24	2	9.22669	26.2123	196.078	1906.37	1786.66	0.122608	-52.76	12.26	65.1	118	-1	111.214	123.382	143.493	20.11	6.0024	3.97535	-2.02705	2	0.163212	0.185078	-15.3	-0.120472	-249.6	-1.96535	-64.136	-37.43	-134.8	-1.06189
2028-11-01	1	18	2	3	-64	8.2	18	7.3	406	296	-45.3	61.5001	0.58	0.492615	-8.14551	48.3204	500	2	1	6.2098	14.9254	42.9185	3847.52	3520.31	0.0424964	-56.52	11.22	211.7	1156	860	16.4384	702.81	193.878	-508.932	6.48719	6.65336	0.166172	4	0.0158569	0.0107466	-49.4385	-0.12177	-1378.78	-3.39602	-53.171	-19.425	-949	-2.33744
27.07.2020	1	14	1	3	-61	18	20.76	7.2	346.821	970	-35.73	67.3469	0.605	0.712682	-5.76669	46.3212	725	2.76	1	6.45233	31.746	48.7805	2887.73	1893.49	0.0721976	-48.52	12.79	844	1701	731	13.6019	1747.38	1521.6	-225.78	7.62777	6.13874	-1.48903	4	0.0183552	0.0129375	-49.4385	-0.142886	-1378.78	-3.98493
	2	14	1	3	-68	68	68.1	16.3	239.354	127	-45.34	74.6665	0.63	0.818605	-10.2634	81.7502	70	2.958	1	5.97307	11.0254	37.1747	1726.5	1599.18	0.054484	-55.7	10.36	80.3	272	145	53.5492	152.984	-234.928	-387.912	4.56621	1.81061	-2.7556	4	0.0466605	0.0246699
	3	14	1	3	-68	59	89.7	35.9	400.223	99.9	-45.13	83.3937	0.55	0.693593	-10.3224	91.7063	50	0.29	2	6.06914	9.58773	33.67	1575.79	1475.81	0.0657355	-55.2	10.07	70.4	207	107.1	68.1818	85.464	29.316	-56.148	3.52237	2.92654	-0.595823	4	0.048881	0.037804	-6.7	-0.01675	-176.4	-0.441
28.07.2020	1	15	2	3	-62	39	104.7	31.6	301.815	140	-38.18	77.6173	0.45	0.466968	-11.3818	56.9939	160	0.376	2	9.54057	18.9036	68.4931	1824.29	1683.75	0.102656	-51.6	13.42	104	263	123	80.7692	111.307	146.227	34.92	6.53595	5.83771	-0.698236	2	0.0844946	0.114904	-15.9	-0.0493789	-640.3	-1.98851	-52.507	-40.63	-107.6	-0.35651
	2	15	2	3	-64	73.4	186.444	39.7	212.932	31.5	-38.8	71.3728	0.39	0.374729		51.8493	28	0.48	2	7.1309	7.44048	84.7458	1939.57	1907.75	0.104885	-56.4	17.6	19.7	67.5	36	182.741	14.956	12.039	-2.917	2.95159	1.71851	-1.23309	3	0.099756	0.11553	7.32422	0.0364389	3.05176	0.0151829	-55.12	-43.96	-48.8	-0.229181
29.07.2020	1	16	2	3	-59	180	276.25	63	228.054	27	-47.8						10	0.38	2	9.70423	10.4384	85.4701	726.14	699.44	0.224442	-60.39	12.59	15	70.7	43.7		17.1608	21.4672	4.3064	2.97265	2.47158	-0.501075	2	0.167639	0.236932	-13.4	-0.0587719	-467.5	-2.05044	-59.4	-37.67	-308.8	-1.35406
	2	16	2	3	-66	52.6	212.167	82	386.489	41.3	-44.9	82.462	0.49	0.510275	-10.1177	123.891	50	0.395	2	6.464	6.80272	64.9351	1823.69	1782.12	0.112489	-55.7	10.8	33.4	73.9	32.6	128.743	31.8784	44.9616	13.0832	2.71297	2.38209	-0.330881	2	0.059445	0.0834724	23.1934	0.0587174	-529.175	-1.33968	-58.09	-40.04	-385.9	-0.998477
	3	16	2	3	-70	141.9	400.4	65.6	163.836	22.8	-46.3	91.0051	0.455556	0.505369	-6.97408	123.745	15	0.45	2	9.14984	9.85222	114.943	834.46	811.73	0.19563	-60.4	14.1	12.2	65.7	42.9		16.9536	30.5968	13.6432	2.3218	2.04082	-0.280985	2	0.0636452	0.0890237	9.15527	0.0561673	-68.9697	-0.423127	-62.01	-40.4	-304.7	-1.85978
03.08.2020	1	17	1	3	-70	18	18.12	3.7	204.194	427	-52.46	80.0523	1.235	0.32	-3.3255	28.0731	675	0.015	2	2.23023	7.93021	58.1395	2518.58	2067.48	0.0188508	-55.9	3.44	425	450	23	9.64706	740.88	901.44	160.56	2.7571	2.14316	-0.613936	1	0.0228399	0.0236165	-15.6	-0.0764706	-240.5	-1.17892
	2	17	1	3	-73	36	38.15	7.9	207.077	405	-39.09	67.2162	0.485	0.592655	-3.85675	37.0323	500	2.06	1	10.7324	29.4985	47.8469	3447.02	3076.1	0.229296	-46.1	7.01	349	543	138	39.8281	627.88	318.3	-309.58	6.36943	9.4162	3.04677	4	0.0548824	0.0246226
04.08.2020	1	18	1	3	-69	26.7	30.8	11.5	373.377	335	-44.79	79.6397	0.43	0.484676	-6.38284	40.8655	339	2.7	1	8.29916	17.452	56.1798	3939.77	3636.22	0.0449999	-53.8	9.01	265	653	318	23.3962	459.41	374.486	-84.924	7.39645	6.67557	-0.720882	4	0.0447666	0.027547
05.08.2020	1	19	2	3	-60	68	98	27	275.51	135	-40.05	85.0885	0.555	0.711854	-10.8867	120.053	130	0.0665	2	5.12066	7.86164	25.4453	1567.59	1432	0.0404529	-53.5	13.45	93	239	104	69.8925	88.59	89.82	1.23	3.43289	3.55745	0.124566	1	0.0338653	0.0304243	-13.4	-0.0485507	-197.8	-0.716667	-56.91	-38.97	-334.7	-1.21484
28.08.2020	1	18	2	3	-52	1.11	6.6	8.3	1257.58	2928.5	-30.53	76.1661	0.495	0.601253	-1.32576	52.3071	1800	2.86	1	4.78421	23.6967	35.5872	5953.64	2962.58	0.0565868	-55.4	24.87	1665	6000	3071.5	2.76276	3092.16	2730.36	-361.8	7.44048	6.66223	-0.778251	4	0.0109088	0.00821989	-275.879	-0.351886	-2749.63	-3.50719
	2	18	2	3	-63		36.95	8.1	219.215	418	-39.76	78.8636	0.48	0.568481	-7.74126	74.4404	350	2.91	1	5.04487	14.8588	38.61	2691.32	2249.94	0.0309451	-54.02	14.26	324	945	527	18.4568	500.472	281.826	-218.646	4.71921	4.11184	-0.607365	4	0.0238449	0.0135115	-47.6074	-0.124627	-863.647	-2.26086
03/09/2020	1	15	2	3	-66	16.1	29.85	16.8	562.814	400	-42.82	77.85	0.566667	0.695029	-7.89721	80.6405	320	3.06	1	4.74666	16.1551	42.9185	2499.13	2098.59	0.0552561	-51.7	8.88	306	638	238	27.1242	267.968	59.392	-208.576	4.66418	4.28633	-0.377853	4	0.0245705	0.0161779	-7.32422	-0.0147964	-869.751	-1.75707
	2	15	2	3	-76	13.9	15.7	11.3	719.745	431	-44.41	71.8151	0.49	0.533967	-8.41094	56.2188	350	2.4	1	5.25913	18.315	34.1297	3193.52	2738.79	0.0633731	-59.05	14.64	281	1350	919	3.38078	168.24	15.632	-152.608	3.97614	5.6243	1.64815	4	0.0247329	0.0157103
06.10.2020	1	14	2	3	-51	58.5	77.2	16.4	212.435	197	-40.29	77.4807	0.58	0.563411	-6.64868	56.5633	180	0.019	2	6.6039	19.3798	63.2911	1767.14	1554.67	0.303724	-49.07	8.78	210	328	116	52.0476	284.672	357.336	72.664	2.51636	4.12371	1.60735	2	0.178016	0.185646	-7.3	-0.034434	-330.2	-1.55755	-63.671	-38.71	-233.2	-1.09775
	2	14	2	3	-51	61.3	97.95	27.6	281.776	83.4	-40.12	66.5604	0.42	0.479625	-8.55541	74.0115	80	0.09	2	6.93077	10.0402	86.9565	1237.24	1153.52	0.129712	-55.3	15.18	50.3	165	81.6	93.4394	40.239	48.984	8.74499	4.42674	3.63372	-0.793016	1	0.105086	0.101011	3.1	0.0109929	-200.8	-0.712057	-62.72	-40.27	-225.5	-0.80028
	3	14	2	3	-67	16.1	22.15	14.7	663.657	416	-43.8	82.3933	0.425	0.457642	-7.15603	38.3005	325	2.26	1	6.92413	23.753	51.8135	4023.38	3583.58	0.194487	-54.9	11.1	376	1194	778	13.5638	471.072	193.011	-278.061	8.19001	4.89956	-3.29045	4	0.0275377	0.0208196	-33.5693	-0.0551221	-1143.8	-1.87816
07.10.2020	1	15	1	3	-71	10.3	21.6	17	787.037	521	-42.91	76.1926	0.45	0.470612	-7.59623	41.6034	500	3.7	1	6.52536	23.3645	46.9484	4023.06	3477.67	0.11857	-52.19	9.28	468	1019	498	16.688	963.288	718.08	-245.208	7.65111	3.68732	-3.96379	4	0.0559294	0.027304	-62.9	-0.0799238	-1524.7	-1.93736
	2	15	1	3	-78	68.7	94.6	39.7	419.662	145	-41.16	79.6513	0.533333	0.738321	-9.1403	106.897	100	0.5	2	4.8033	8.34725	26.738	1895.92	1750.59	0.0416841	-53.6	12.44	111.2	316	171	57.554	189.1	81.14	-107.96	3.09693	1.89	-1.20693	4		0.0139327	-26.2	-0.103968	-545.7	-2.16548
08.10.2020	1	14	1	3	-62	7.14	9.43	12.1	1283.14	1358.9	-34.99	72.5273	0.483333	0.536714	-4.53929	43.5966	1000	3.24	1	5.15563	35.5872	51.5464	5307.33	3885.87	0.0881396	-47.79	12.8	229	481	-877.9	53.3188
	2	14	1	3	-73	27.4	32.8	15.8	481.707	647	-35.82	81.3374	0.545	0.806713	-6.07428	65.2622	390	1.72	1	6.38326	23.4742	30.9598	2497.61	1850.17	0.0554518	-46.3	10.48	558	1011	364	24.552	707.304	204.464	-502.84	4.42674	4.79157	0.36483	4	0.0195698	0.0121718					-46.93	-30.06	-497.5	-0.387721
	3	14	1	3	-77	33.97	33.25	18.1	544.361	226	-43.66	81.0926	0.545	0.806399	-8.82959	82.5603	210	2.897	1	5.46386	12.285	33.4448	1864.22	1637.28	0.0564351	-53.9	10.24	178	546	320	34.2697	436.9	180.66	-256.24	4.79386	3.62582	-1.16805	4	0.0649954	0.0101801
09.10.2020	1	15	2	3	-70	18	22.3	11.7	524.664	270	-40.72	80.0103	0.511111	0.535544	-8.40101	70.1251	260	2.35	1	4.89052	13.1752	41.841	2859.36	2566.27	0.0405266	-53.16	12.44	207	752	482	33.0435	497.445	221.565	-275.88	4.36491	2.80899	-1.55592	4	0.0318189	0.0133728
10.10.2020	1	16	2	3	-66	55.6	53.2	13.4	251.88	428	-41.48	74.5	0.5	0.624272	-5.70782	80.4282	240	3.106	1	5.81983	21.645	47.3934	2456.75	2028.36	0.0521526	-35.9	9.4	380	565	137	63.4211	443.214	173.322	-269.892	4.52899	3.83436	-0.69463	4	0.0306018	0.0165953
	2	16	2	3	-60	15.7	22.45	5.2	231.626	586	-46.44	83.4856	0.79375	0.811747	-3.32958	46.1245	370	0.0156	2	4.1781	24.8756	67.1141	1816.77	1230.55	0.0353574	-51.44	5	464	672	86	18.4483	404.12	473.64	69.52	2.32992	3.65097	1.32105	1	0.0309064	0.0241549	-26.2	-0.103968	-545.7	-2.16548
12.10.2020	1	18	1	3	-60	5.82	13.12	6.7	510.671	1197	-40.5	70.7605	0.45	0.467341	-4.94939	42.0107	1400	3.83	1	5.07155	29.4118	50.5051	3730.77	2509.79	0.0800149	-55.7	15.2	664.3	2848	1651	6.47298	1705.06	1428.14	-276.912	9.01713	6.97837	-2.03877	3	0.0246411	0.0153297	-213	-0.484091	-1228	-2.79091
13.10.2020	1	19	1	3	-70	35.9	47.3	20.5	433.404	95	-47.9	89.4766	0.42	0.48076	-12.6626	104.202	60	0.019	2	3.97001	5.43478	37.4532	4023.1	3903.78	0.0240302	-57.8	9.9	72.6	247	152	30.303	109.731	40.53	-69.201	2.97708	1.91022	-1.06686	4	0.0387514	0.0176049	7.3	0.01423	-427.2	-0.832749
24.10.2020	1	15	2	3	-51	35.9	72.3	23.3	322.268	42	-40.9	82.3986	0.38	0.405287	-7.25323	65.4321	80	0.05	2	6.19185	7.91766	117.647	2499.67	2457.5	0.0932485	-56.7	15.8	26	186	144	126.923	119.923	181.478	61.5552	4.23729	4.4843	0.247017	2	0.0602638	0.0707984	-29.3	-0.0869436	-516	-1.53116	-63.77	-53.06	-258	-0.774775
	2	15	2	3	-66	38.2	68.4	22.8	333.333	243	-41.22	82.7465	0.515	0.617142	-10.8464	86.0599	80	3.06	1	5.76718	11.0011	38.3142	3037.43	2856.11	0.0696329	-52.4	11.18	205	424	181	37.0732	207.19	20.28	-186.91	4.96278	3.56252	-1.40026	4	0.0305229	0.0186854
28.10.2020	1	16	1	3	-51	29.6	36.3	4.2	115.702	198	-38.89	65.6797	0.6125	0.727929	-1.75425	54.8774	600	0.088	2	6.05615	14.0449	42.9185	1500.75	1302.06	0.0676963	-47.03	8.14	167	268	70	77.6647	1014.09	1323.46	309.372	5.67215	7.18391	1.51176	2	0.0222015	0.0215694
	2	16	1	3	-56	187	206	30.2	146.602	27	-49.7	83.93	0.35	0.365112	-3.69198	136.199	20	0.19	2	11.4328	14.2653	161.29	1398.35	1371.72	0.311399	-58.63	8.93	18	67	40	76.1111
	3	16	1	3	-54	6.06	11.1	5.5	495.495	1862	-30.55	52.5295	0.48	0.606018	-1.48831	45.7063	2250	1.639	1	6.84599	32.5733	48.7805	3788.91	1877.74	0.0300747	-42.5	11.95	1391	3108	1246	12.5809	2464.64	2381.36	-83.2799	8.69565	7.75795	-0.9377	3	0.015743	0.0135867	-139	-0.305495	-1354	-2.97582
	5	16	1	3	-65	11.3	12.4	9.2	741.935	613	-38.9	76.8571	0.49	0.601674	-6.40857	53.8434	500	3.32	1	7.08256	23.2019	35.2113	2497.83	1884.64	0.108035	-52	13.1	428	1257	644	18.6916	759.26	538.54	-220.72	4.98256	3.26691	-1.71565	4	0.0429623	0.0174313	-144	-0.381963	-1333	-3.53581	-48.565	-37.627	-232.5	-0.616711
2.11.2020	1	17	1	3	-72	41.5	39.85	11.6	291.092	178	-43.53	71.5642	0.415	0.505902	-10.8807	41.3196	240	0.0229	2	8.20374	13.947	52.9101	4023.34	3837.81	0.0542323	-53.6	10.07	130	363	185	49.2308	375.888	151.904	-223.984	8.17661	9.66184	1.48522	4	0.030593	0.017467	3.1	0.0114391	-92.8	-0.342435
	2	17	1	3	-79	43.3	43.8	11.1	253.425	145	-46.59	79.1022	0.405	0.447734	-14.9028	47.6887	140	0.012	2	11.6111	16.1551	54.6448	4008.84	3839.74	0.0309368	-55.02	8.43	119	307	162	41.8487	174.325	39.83	-134.495	8.23723	3.35121	-4.88603	4	0.0691814	0.0400315					-49.141	-37.49	-257.2	-0.949077
9/11/2020	1	14	1	3	-63	32.4	40.3	15.4	382.134	179.3	-45.08	90.4625	0.545	0.574912	-10.6115	63.9106	150	0.06	2	6.05735	10.5485	34.0136	3505.36	3302.47	0.0611925	-54.46	9.38	188	478	250	29.4681	205.944	109.976	-95.968	5.9453	3.56633	-2.37897	4	0.0284442	0.0224591	-10.4	-0.0320809	-564	-1.73977	-53.056	-34.288	-531.7	-1.55468
	2	14	1	3	-73	38.9	52.2	20.6	394.636	92	-49.69	89.9049	0.5	0.53773	-12.0327	57.9	80	0.139	2	7.41417	12.0919	53.1915	3924.16	3808.47	0.0879782	-56.7	7.01	78	201	109	42.3077	139.031	53.3596	-85.671	3.80662	3.15856	-0.648064	4	0.141951	0.0300297	18.3	0.0474015	-393	-1.01797	-55.704	-35.324	-680.4	-1.76269
	4	14	1	3	-71	10.9	9.8	10.7	1091.84	1087	-41.95	75.8749	0.455	0.473281	-5.97519	46.2543	1500	3.59	1	5.94345	25.8398	31.9489	2908.37	1797.7	0.0254041	-54.7	12.75	772	2916	1829	6.86528	1956.3	1558.6	-397.7	8.79507	2.79096	-6.00412	3	0.0243309	0.0150076
10.11.2020	1	15	2	3	-71	11.2	12.05	10.4	863.071	824	-37.7	79.1605	0.4	0.466873	-6.55421	36.5834	300	3.65	1	10.5504	21.5054	48.3092	4022.18	3723.67	0.108895	-50.3	12.6	766	1860	1036	12.6632	757.383	522.852	-234.531	16.8919	10.6952	-6.1967	4	0.0190115	0.0146201
	3	15	2	3	-71	20.5	22.48	3.9	173.488	1461	-27.5	79.2541	0.55625	0.7918	-1.26983	92.1403	1424	4.5	1	70.5415	49.7512	73.5294	1612.01	128.31		-39.7	12.2	1479	2151	562	13.7255	984.753	517.572	-467.181	13.624	8.08407	-5.5399	3	0.026324	0.0149505
	5	15	2	3	-66	35.7	36.6	8.5	232.24	356	-41.08	80.5117	0.5625	0.668936	-3.72557	34.8824	290	1.9	1	10.1267	24.0964	62.1118	2498.56	2142.38	0.0570902	-50.69	9.61	313	636	280	29.7444	429.629	214.171	-215.458	8.86525	7.19424	-1.671	4	0.0435936	0.0229563	-11.6	-0.0446154	-131.8	-0.506923	-45.55	-30.23	-696.5	-2.67885
11.11.2020	1	16	2	3	-67	38.7	47	34.4	731.915	334.7	-38.5	81.2373	0.575	0.513668	-5.54134	71.9384	220	2.23	1	6.01249	20	50.7614	2890.41	2532.31	0.0864037	-51.12	12.62	271	715	380.3	32.7675	450.642	239.294	-211.348	5.12821	4.16493	-0.963274	4	0.0409054	0.01759	-9.2	-0.022549	-333	-0.816176	-45.97	-29.55	-593.8	-1.45539
	2	16	2	3	-70	21.9	32.3	11.7	362.229	650	-38.5	82.0669	0.39	0.439458	-7.19269	35.9379	520	2.47	1	9.31895	26.1097	47.619	4021.8	3347.93	0.0997001	-48.8	10.3	516	1011	361	21.7054	849.024	648.582	-200.442	11.8906	8.69565	-3.19495	4	0.0157192	0.013183
13.10.2021	1	14	2	3	-72		44.3	17.2	388										2																						-14.6		-145.3
14.10.2021	1	15	1	3	-65				510										1
	2	15	1	3	-60		21	17.4	836										1																						-155		-450
15.10.2021	1	16	1	3	-56		19.5	10.4	554										1																						-153		-421
	2	16	1	3	-63		12	14.9	752										1																						-204		-1607
	3	16	1		-67				845										1																						-83		-845
	4	16	1	3	-69				449										1																						-33		-449
17.10.2021	1	14	1	3	-59		20	13.6	683										1																						-217		-1134
	2	14	1	3	-64		17	11.8	702										1																						-328		-1339
	3	14	2	3	-62		142	50.7	358										2																						-11.6		-1642
18.10.2021	1	14	2	3	-60		163	25	152										2																						-20		-384
	3	14	1	3	-66		46	13.8	297										2																						-20		-622
	4	14	1	3	-66		64	16.1	252										1																						-30		-516
19.10.2021	2	16	1	3	-60		14.6	9.5	650										1																						-351		-753

## Sheet: W2
Animal Info										Rec Ramp							MN Type			Repetitive Firing						SubTH V Trajectory						PIC Ramp Rec-Derec/Firing Rate Hysteresis									H-Current				PIC
Date	Cell no	Age (PX)	Sex (M:1, F:2)	Segment (1,2,3)	Vm	Rin SS	Rin Pass	Tau	CapCalc	Rheobase ramp	spike TH Ramp	Spike Amp	Spike RT	Spike HW	AHP amp	AHP HW	Rb 5s step	RF latency	Fast (1) Slow (2) trans (3)	Min FR	FR 2*Rb	Max FR	Offset Current	Current range	SPR Slope	Vtakeoff	dV	Ito	Itheoretical	Itheo-Iactual	Rm Passive	Ionset	Ioffset	Delta I	Freq onset	Freq offset	Dfreq	Type	Inc Slope	Dec Slope	Ih -70	Ih dens -70	Ih -110	Ih dens -110	Onset V	Peak V	I Max	I Dens
2019-01-28	1	7			-61	23.5	21.8	7.1	325.688	665	-38.7	72.672	0.31	0.428543	-7.86264	32.4053	550	3.69	1	13.6497	32.0513	38.61	1499.25	831.97	0.114803	-52.6	13.9	388	1236	571	19.0722	893.76	477.84	-415.92	20.6186	15.2905	-5.32804	3
2019-03-04	2	8		1	-61	23.2	27.3	11.7	428.571	742	-31.7	68.1709	0.59	0.61179	-3.36882	29.6139	850	4.199	1	13.6586	35.461	45.6621	2005.01	1254.31	0.0921666	-48.7	17	536	1439	697	21.0821	1211.88	938.01	-273.87	20	12.9032	-7.09677	4
	3	8		1	-66	21.4	24.1	16.1	668.05	408	-33.94	61.8423	0.61	0.558764	-7.31341	46.2654	625	0.091	2	10.7189	21.8341	36.1011	1582.14	1157.34	0.0280502	-56.1	22.16	195	1518	1110	20	936.36	510.42	-425.94	16.4204	10.4058	-6.01453	4
	4	8		3	-62	22.2	24.3	11.6	477.366	632	-39.75	74.5437	0.62	0.693207	-7.24485	41.7177	580	0.138	2	13.1897	27.7008	37.3134	2542.98	1878.51	0.0903386	-56.6	16.85	158	1206	659	21.519	651.93	474.81	-177.12	11.6009	7.63359	-3.96734	3	0.0250678	0.0227955
05.03.2019	2	9		1	-65	26.6	34.35	19.9	579.33	343	-36.18	60.8074	0.59	0.656985	-5.09624	33.5272	160	3.8	1	9.52627	27.1003	38.3142	1717.07	1356.83	0.114879	-54.6	18.42	243	826	483	22.2222	382.08	53.232	-328.848	10.1523	3.35796	-6.79433	4
	3	9		1	-61	34.3	38	12.3	323.684	362	-39.8	73.2586	0.59	0.726744	-9.25861	44.0681	260	2.4	1	9.66225	26.1097	41.6667	2398.03	2018.81	0.120167	-52.03	12.23	287	722	360	27.77	451.504	202.032	-249.472	11.1732	7.59878	-3.5744	4
	4	9		3	-66	23.9	34.95	16.3	466.381	610	-38.18	75.3752	0.67	0.801238	-8.1285	57.6414	480	3.93	1	9.83018	22.0264	29.9401	2289.53	1662.14	0.0399825	-49.6	11.42	426	870	260	24.4131	716.64	387.24	-329.4	8.84173	6.27353	-2.56821	4
	5	9		3	-66	35	40.75	10.3	252.761			74.2414	0.74	0.834471	-5.84845	68.5189	550	0.095	3
2014-03-01	4	8		3	-54	26.3	33.1	18.5	558.912	525	-34.5	68.1416	0.81	1.07038	-3.28483	80.3574	625	0.32	2	4.34203	14.0252	23.1481	2514.46	1972.46	0.0250546	-44.37	9.87	459	787	262	34.0523
	5	8		3	-68	28.2	34.5	12	347.826	408	-40.8	75.3811	0.6	0.708102	-7.6836	47.2775	250	4.46	1	6.89662	19.5312	36.9004	2372.74	1947.61	0.0503326	-51.3	10.5	323	703	295	26.935	774.504	848.976	74.472	6.89655	6.62	-0.28	1
2019-03-22	1	7		1	-62	23.9	23	17.9	778.261	485	-39.6	70.0718	0.69	0.785441	-3.84368	45.6784	380	3.65	1	8.72798	27.3224	41.3223	1755.84	1253.6	0.0735689	-50.9	11.3	356	804	319	25.5618
	2	7		3	-66	23.7	28.1	14.5	516.014	668.9	-35.6	71.9817	0.59	0.637218	-7.91076	42.0524	620	4.5	1	11.8111	30.6748	36.4963	1830.59	1144.38	0.133268	-54.08	18.48	337	1310	641.1	17.5668	801.84	379.99	-421.85	7.12251	11.2233	4.10084	4
	3	7		3	-63	126.8	205.1	70	341.297	65	-44.2	88.7922	0.96	1.09562	-9.78785	152.309	35	0.3	2	5.7027	8.34725	29.8507	1597.33	1514.66	0.0553618	-51.6	7.4	36.9	70	5	227.642	52.28	67.928	15.648	3.93236	3.94945	0.0170839	2	0.0466871	0.0459193
2025-03-01	1	10	2	1	-52	101.2	70.8	20.1	283.898	208	-42.5	73.4482	0.76	0.862946	-7.25075	68.0067	219	0.998	2	6.27666	15.083	41.3223	1374.1	1148.72	0.0696584	-50.29	7.79	157	290	82	61.8471	220.952	234.2	13.248	5.0025	5.56793	0.565427	1	0.0461607	0.0518175
	2	10	2	3	-60	18.4	24.25	7.6	313.402	988	-35.3	69.7512	0.55	0.574237	-7.46087	39.0398	950	2.5	1	10.4905	31.4465	37.4532	4061.76	3009.79	0.0938463	-52.6	17.3	715	2283	1295	10.3497	1519.96	1110.24	-409.72	16	13.1406	-2.8594	4
	3	10	2	3	-66	75.4	49.15	15.6	317.396	295	-40.22	75.2786	0.69	0.761498	-7.51257	51.816	200	4.36	1	7.25615	20.9205	47.3934	2515.68	2231.02	0.0819084	-49.8	9.58	245	573	278	41.6327
2011-04-01	1	7		1	-67	44.6	51.75	23.1	446.377	332	-35.6	76.5836	0.86	0.997316	-6.75838	79.269	200	1.5	1	6.90776	19.5695	31.1526	1249.88	899.9	0.0444848	-48.3	12.7	270	528	196	43.3333	307.426	209.244	-98.182	5.18135	4.02253	-1.15882	3
	2	7		1	-57	35.7	38.6	15.2	393.782	396	-39.8	70.8739	0.76	0.852536	-7.55668	51.5185	300	3.75	1	8.76724	25.5754	44.2478	2111.57	1696.67	0.0966243	-53.07	13.27	260	679	283	26.6538	397.104	136.848	-260.256	3.94166	2.82566	-1.11601	3
	3	7		1	-62	32	36.1667	26.1	721.659	395	-39.54	74.0747	0.67	0.662235	-8.06401	41.9594	220	4.56	1	8.91716	26.1097	45.2489	2515.68	2106.33	0.0774092	-53.77	14.23	259	851	456	24.0541	445.056	227.392	-217.664	8.59107	6.69344	-1.89762	4
2012-04-01	1	8		3	-63	44	51.0667	6.5	127.285	549	-35.7	74.0776	1.19	1.42394	-5.65396	54.7497	420	0.129	2	5.40891	16.6113	25.3165	2073.36	1445.25	0.0500457	-47.6	4	519.8	773	221	23.8553	608.832	554.088	-54.744	3.8432	4.03226	0.18906	1	0.0224063	0.0187618
2017-04-01	1	7		3	-57	16.7						69.3937	0.88	0.860448	-5.77122	47.4041	810	0.067	3
	2	7		3	-59	95.6	152.6	69.3	454.128	69	-42.3	83.1233	1.07	1.34246	-9.22537	146.236	80	0.213	2	4.73252	6.71592	22.6757	1807.85	1720.11	0.0345675	-51.45	9.15	53.8	116	47	158.922	48.048	33.726	-14.322	2.49563	2.28154	-0.21409	3
2019-04-19	1	9		3	-61	44.5	45.84	10.9	237.784	429	-37.7	59.5121	0.79	0.984507	-5.43842	52.7141	400	3.5	1	4.88318	29.5858	71.9424	1249.35	865.11	0.0558988	-48.71	11.01	295	533	104	38.2712	449.312	296.192	-153.12	6.035	4.58085	-1.45415	4
	2	9		3	-64	35.8	45.16	23.6	522.586	536	-35.1	75.8694	0.76	0.915618	-6.50843	78.5958	450	3.9	1	5.74162	19.685	28.4091	1591.1	1095.45	0.084955	-46.7	11.6	397	733.5	197.5	33.5013	633.6	369.996	-263.604	8.51789	4.74158	-3.7763	4
2022-04-01	1	12		1	-53	44.6	66.9333	22.1	330.179	150	-39.99	87.6248	0.73	0.895409	-7.20533	80.929	120	0.416	2	5.46242	10.3093	26.8097	2400.83	2234.1	0.0413411	-55.8	15.81	80.6	298	148	52.1092	142.302	130.326	-11.976	3.76364	3.6846	-0.0790448	1	0.0426448	0.0366864
	2	12		1	-53	53.4	70.1	16.9	241.084	190	-41.6	70.8868	0.52	0.531833	-8.85812	49.0036	170	0.1757	2	4.98893	8.82613	97.0874	2516.66	2378.74	0.0869681	-51.6	10	120	217	27	70	205.168	184.8	-20.368	4.29553	2.46975	-1.82579	1	0.0876034	0.0758278
	3	12		1	-67	26.9	38.2333	17.8	465.562	380	-35.48	76.4917	0.51	0.616894	-3.44406	39.1788	320	3.94	1	10.6847	28.4091	40.1606	1137.88	786.84	0.0803915	-54.02	18.54	228	888	508	26.2281	538.144	420.032	-118.112	11.5741	9.54198	-2.03209	4
23.04.2019	1	9		3	-63	26.6	31.3333	14.7	469.149	308	-39.8	78.5505	0.63	0.658742	-12.267	48.4127	180	3.12	1	7.85018	19.7239	40.3226	2516.18	2239.08	0.0854246	-55.4	15.6	253	970	662	18.1818	333.492	94.452	-239.04	4.31593	2.58264	-1.73328	4
	2	9		3	-62	9.8	10.375	9.7	934.94	1288	-38.6	73.9015	0.58	0.573539	-3.40851	25.4744	1225	3.07	1	13.59	38.1679	39.8406	2515.98	1210.99	0.0782815	-54.37	15.77	970				1654.18	1047.6	-606.576	18.6567	12.3001	-6.35659	4
	3	9		3	-62	2.8	10.6667	11.6	1087.5	1619	-35.68	67.8519	0.53	0.550885	-4.38963	33.9582	1520	4.27	1	5.95859	26.0417	27.4725	2514.58	876.29	0.0510693	-49.3	13.62	1280				2059.07	1523.71	-535.36	8.63558	7.63942	-0.996159	4
	4	9		3	-57	24.7	28.7	11.8	411.1	467	-39.5	71.1566	0.54	0.648674	-6.22658	36.05	300	3.99	1	10.7111	30.7692	41.841	2169.44	1684.57	0.0821335	-49.3	9.8	402	816	349	26.6169	496.561	205.767	-290.794	11.2486	6.98324	-4.26535	4
2029-04-01	1	7		1	-56	26	28.1667	11.1	394.083	424	-36.13	71.5804	0.677778	0.735089	-9.27902	48.2632	350	1.7	1	13.5461	32.6797	45.6621	1555.19	1113.98	0.0910112	-49.04	12.91	303	759	335	36.1716	539.838	256.266	-283.572	12.4533	6.16523	-6.28807	4
1930-04-01	1	8		3	-69	33.1	35.6	14.1	396.067	527	-39.64	77.5582	0.64	0.94082	-7.61226	63.1317	480	3.68	1	9.84742	25.1256	29.6736	1468.94	924.96	0.0610138	-50.8	11.16	341	760	233	26.9795	564.586	446.446	-118.14	10.3842	11.5473	1.16313	4
2015-05-01	1	7		1	-64	26.9	21.1667	14.4	680.315	435	-36.5	71.726	0.67	0.712414	-3.21427	36.1173	310	3.56	1	7.09995	29.7619	41.3223	1791.19	1338.65	0.179433	-52.34	15.84	325	1077	642	23.5692	565.66	373.4	-192.26	9.38967	8.73362	-0.656047	4
	2	7		1	-70	24.1	29.6667	18	606.742	889	-35.98	76.372	0.51	0.531844	-5.03407	34.2466	840	2.17	1	23.4899	51.8135	61.3497	1723.25	817.39	0.124591	-47.9	11.92	603	1149	260	20.0663	898.2	671.568	-226.632	19.1571	17.0358	-2.12131	4
	3	7		1	-72	21.06	27.0667	13.4	495.074	429	-39.49	75.7512	0.92	0.637477	-10.0764	42.9359	260	3.78	1	10.0272	26.3852	48.0769	2515.15	2068.9	0.0860668	-54.87	15.38	295	1098	669	17.3898	520.06	114.74	-405.32	10.4603	6.64011	-3.82014	4
2016-05-01	1	8		3	-57	14.4	15.2667	17.9	1172.49	932	-34.5	71.6255	0.66	0.679272	-4.68232	42.2816	810	2.6	1	14.9778	33.2226	49.505	2492.32	1542.84	0.0117723	-50.38	15.88	587.5	1851	919	16.3745	1423.26	1335.78	-87.48	11.6279	11.1359	-0.492049	1
	2	8		3	-56	23.8	35.2	12.5	355.114	563	-32.5	65.7972	0.95	0.77882	-8.45227	49.5157	300	0.35	2	7.63437	24.5098	41.3223	2476.6	1817.17	0.0543593	-49.1	16.6	429	1096	533	25.4079	631.268	428.846	-202.422	8.33333	4.24268	-4.09065	3	0.0287821	0.0242348
	3	8		3	-65	34.1	41.1333	17.4	423.015	661.9	-33.9	78.098	0.8	0.981654	-5.48025	64.5663	520	3.76	1	6.70866	22.779	34.8432	2313.5	1634.6	0.0419161	-45.46	11.56	506	882	220.1	28.7352	827.606	536.77	-290.836	6.82128	4.64253	-2.17876	4	0.0241473	0.0156973
2022-05-01	1	10		3	-66	23	11.75	14	1191.49	778	-42.978	81.6081	0.61	0.567171	-8.52544	35.8938	560	4.21	1	7.4997	28.7356	43.6681	4062.37	3253.14	0.104537	-56.3	13.322	532	2029	1251	6.95489	1036.8	536.448	-500.352	6.82128	8.38926	1.56798	4	0.0280061	0.0169415
	2	10		3	-62	17.1	27.15	14.1	519.337	578	-36.4	79.3273	0.7	0.559303	-7.27252	34.0924	520	2.5	1	10.062	28.8184	49.0196	4062.52	3420.54	0.0609122	-49.5	13.1	566	1423	845	18.5512	575.224	340.236	-234.988	9.54198	6.49773	-3.04426	4	0.0258103	0.0199264
	3	10		3	-60	99.4	42.4	11.1	261.792	445	-37.9	69.5153	0.8	0.782041	-6.36085	48.9468	300	2.99	1	6.90653	22.5734	38.7597	2868.93	2359.38	0.0742951	-50.51	12.61	349	786	341	27.192
	4	10		3	-64	29.4	58.9	17.5	297.114	276	-39.25	73.8657	0.75	0.645	-9.35011	59.9417	170	3.77	1	8.73716	20.3666	46.083	2204.54	1911.3	0.0601615	-51.7	12.45	219	479	203	37.8995	259.944	105.444	-154.5	7.03235	3.13578	-3.89657	4	0.0431623	0.033325
2028-05-01	1	7		1	-61	29.3	30.35	20.3	668.863	447	-40.2	78.5135	0.66	0.7335	-7.44951	54.518	290	3.22	1	5.56343	18.9036	36.63	2514.68	2050.5	0.0658586	-53.6	13.4	279	972	525	22.9391	456.318	303.012	-153.306	4.46628	2.79877	-1.66751	4	0.0290801	0.0222071
	2	7		1	-64	26.2	25.35	8	315.582	815	-31.2	65.0586	0.577778	0.678205	-4.60231	34.4084	790	3.48	1	10.6111	27.248	54.0541	3301.37	2445.68	0.0492784	-47.7	16.5	565	1439	624	21.7699	935.22	710.4	-224.82	11.9474	10.917	-1.0304	4	0.0256412	0.0201389
	3	7		1	-62	35.2	39	12.4	317.949	405	-38.8	78.1949	0.533333	0.717046	-9.26592	49.565	260	3.4	1	10.3215	30.581	54.0541	2366.48	1944.32	0.0899055	-47.4	8.6	345	592	187	36.5217	311.504	85.52	-225.984	9.56938	5.02008	-4.5493	4	0.0393736	0.0310289
2029-05-01	1	8		1	-55	27.5	29.78	13.7	460.04	480	-43.15	78.3355	0.5	0.743378	-7.22364	48.0574	339	0.42	2	8.57259	26.2467	51.5464	2299.8	1871.75	0.0790398	-49.6	6.45	321	713	233	32.3988	411.678	373.104	-38.5741	9.69932	8.7108	-0.98852	1	0.0349688	0.0346411
	2	8		1	-57	50	61.95	17.1	276.029	216	-38.6	77.3522	0.57	0.759755	-4.55693	34.738	160	2.7	1	10.0286	26.738	57.4713	1945.68	1711.93	0.126648	-50.4	11.8	172	475	259	55.814	313.32	202.46	-110.86	6.69792	5.32198	-1.37594	4	0.0619155	0.0467322
2021-06-01	1	9		1	-65	25.6	100.7	36	357.498	115	-40.7	83.7149	0.52	0.583426	-11.6262	109.636	105	0.36	2	5.35219	9.23361	51.0204	2226.33	2090.47	0.0418545	-54.1	13.4	85.6	257	142	68.9252	62.305	50.085	-12.22	3.18878	3.02939	-0.15939	1	0.0347678	0.0318162
	2	9		1	-56	39.7	63.2667	30.2	477.345	148	-43.2	83.0414	0.51	0.533876	-7.21434	79.9402	110	0.24	2	2.86314	3.43643	60.241	2391.94	2319.19	0.0366128	-53.9	10.7	124	289	141	49.1935	85.404	119.628	34.224	3.48797	2.63505	-0.852921	2	0.0406174	0.0502068
Julu 23	1	7	1	1	-64	14.3	17.55	10.6	603.989	527	-43.3	70.7309	0.5	0.70333	-8.39073	45.639	400	4.25	1	7.23655	21.0084	40.1606	2392.32	1902.44	0.079627	-54.4	11.1	418	1140	613	13.3971	758.604	461.978	-296.626	6.89655	4.26076	-2.63579	4	0.0353628	0.020506
	2	7	1	1	-62	15.9	20	12.2	610	665	-37.6	70.0709	0.45	0.563886	-5.10789	29.6983	690	3.4	1	11.3298	36.63	48.7805	2584.44	1892.52	0.176218	-50.8	13.2	501	1318	653	18.3633	807.338	624.36	-182.978	14.3678	3.7037	-10.6641	3	0.0441865	0.0375067
	3	7	1	1	-68	20.2	18.8	11	585.106	468	-43.6	76.9195	0.38	0.530503	-9.16672	35.8017	300	3.17	1	9.50629	28.4091	54.6448	2897.24	2384.52	0.0759819	-52.9	9.3	374	926	458	18.984	614.229	315.394	-298.834	9.49668	5.24659	-4.25009	4	0.0447826	0.0256959
	4	7	1	1	-65	9.4	12.2	11.4	934.426	835	-40.8	75.9207	0.425	0.509137	-5.11851	28.0744	790	1.76	1	9.70195	37.7358	49.7512	2624.88	1699.1	0.137285	-54.5	13.7	585	1835	1000	9.40171	1135.8	857.779	-278.022	12.9366	10.6383	-2.29831	4	0.0318412	0.0224929
2024-07-01	1	8	2	1	-65	23.1	24.55	9.2	374.745	611	-37.17	74.3802	0.5	0.643868	-4.57702	23.8281	500	2.75	1	15.2062	35.3357	45.4545	2823.04	2167.92	0.102125	-51.5	14.33	430	1035	424	19.7674	672.491	352.865	-319.626	16.4204	8.77963	-7.64073	4	0.0302442	0.0213441
2025-07-01	1	9	1	3	-66	16.6	15.3	10	653.595	705	-37.14	65.2282	0.45	0.459564	-5.49985	33.1896	380	3.52	1	17.2906	48.5437	53.7634	2343.87	1409.81	0.121705	-52.9	15.76	656	2560	1855	10.8232	1120.13	826.464	-293.664	25.5102	18.6567	-6.85349	4	0.0459935	0.0300292
2026-07-01	1	10	2	3	-68	12.8	14.65	8.3	566.553	779	-42.33	73.2903	0.43	0.463823	-4.51045	37.2433	750	3.95	1	9.55995	42.9185	67.1141	2999.35	2175.85	0.164859	-51.6	9.27	637	1219	440	13.1868	1169.88	965.79	-204.088	12.8041	15.5039	2.69978	4	0.0472486	0.0312121
	2	10	2	3	-67	19.3	29	14.7	506.897	315	-45.12						370	3.63	1	13.8242	53.1915	83.3333	1394.13	1128.91	0.41379	-55.06	9.94	163	507	192	30.3067	305.695	210	-95.65	26.5252	19.6464	-6.87883	3	0.0909483	0.0794293
	3	10	2	3	-65	18.3	20	5.8	290	646	-43.82								1	43.8259	42.9185	52.9101	1506	668.96	-0.268811	-52.7	8.88	416	924	278	17.5481
	5	10	2	3	-67	28.7	29.15	13.8	473.413	469	-46.2	70.5501	0.48	0.709762	-5.1371	46.0461	350	0.11	2	5.69279	26.2467	38.7597	1396.52	890.47	0.0677287	-50	3.8	412	528	59	24.2718	602.04	595.56	-6.48003	7.46269	9.47867	2.01599	1	0.0469589	0.0381843
	6	10	2	3	-68	18.9	18	6.5	361.111	508	-39.25	74.8091	0.32	0.471187	-6.3878	29.0622	370	2.05	1	8.53301	37.037	52.9101	3015.69	2461.79	0.227471	-52.9	13.65	439	1381	873	16.1731	541.7	341.26	-200.44	11.4286	8.38926	-3.03931	4	0.0479197	0.0300947
2002-09-01	1	9		1	-69	17.3	26.7	23	861.423	471	-39.2	66.9684	0.41	0.510527	-9.17474	38.7308	360	4.06	1	8.85283	24.4499	40.4858	3157.85	2630.15	0.0586572	-54.8	15.6	276	984	513	18.8406	532.112	187.76	-344.352	8.5034	5.33618	-3.16722	4	0.0437952	0.0250279
	2	9		1	-58	30.5	41.4	13.5	326.087	149	-41.7	76.1099	0.43	0.592457	-9.08498	43.986	140	3.6	1	6.58215	13.1234	50.2513	3310.96	3071.51	0.0544232	-53.5	11.8	188	479	243	34.5745	311.508	125.04	-186.468	6.68449	3.9185	-2.766	4	0.0432503	0.0281017
	3	9		1	-65	13.9	21.5	11.3	525.581	866	-33.6	73.6022	0.42	0.489424	-5.42838	31.498	750	3.78	1	10.2031	37.037	51.8135	4604.87	3775.75	0.086499	-50.51	10.91	110	268	118	86.2727	1196.15	865.402	-330.752	11.7233	8.96861	-2.75472	4	0.0361716	0.0205253
	4	9		1	-69	16.4	18.3333	7.7	420	932	-37.5	69.1898	0.51	0.495479	-4.32795	22.0809	850	3.6	1	20.9616	51.2821	63.2911	3388.59	2413.22	0.14551	-49.2	11.7	708	1499	567	15.2542	1397.19	960.727	-436.468	21.4592	8.49618	-12.963	4	0.0515947	0.0311763
2003-09-01	3	10	2	1	-60	48.9	93.85	42.1	448.588	135	-38.5	72.2776	0.7	0.704913	-10.3203	71.838	90	0.37	2	5.68992	9.92064	44.6429	2266.2	2114.33	0.052973	-54.6	16.1	91.4	269	134	59.081	97.0035	109.225	12.221	3.54359	4.33276	0.78917	1	0.0381578	0.0390963
	4	10	2	1	-52	85.8	151.2	35.9	237.434	73.5	-39.4	73.7213	0.75	0.842275	-6.39897	104.493	100	0.76	2	7.62352	12.837	40.6504	676.07	585.7	0.0926479	-50.02	10.62	58	120	46.5	172.069	84.648	98.268	13.62	3.43643	4.75059	1.31417	1	0.0821195	0.0822846
2005-09-01	1	9	1	3	-68	32.2	31.75	17.4	548.031	446	-42.6	79.8365	0.6	0.640938	-4.73887	34.6382	300	2.56	1	11.0857	34.7222	52.0833	2495.94	2032.59	0.146289	-52.4	9.8	374	745	299	20.3209	568.489	302.953	-265.535	11.7371	5.97015	-5.76694	4	0.0559639	0.0340594
	2	9	1	3	-66	18.7	27.1	17.6	649.446	441	-39.6	69.5871	0.48	0.532381	-5.7905	38.4496	260	2.91	1	9.71689	30.303	48.5437	1969.54	1511.02	0.0992961	-53.6	14	368	925	484	17.3913	553.868	131.865	-422.003	11.1607	5.48246	-5.67826	4	0.0472407	0.0251366
2019-09-19	2	9	2	3	-56	131.7	141	15.8	112.057	65	-38.25	65.0791	0.73	0.857872	-3.64364	39.0019	110	0.137	2	13.4157	31.0559	51.0204	393.93	310.75	0.254972	-49.3	11.05	50.4	107.2	42.2	212.302	124.265	161.7	37.435	6.57895	13.0548	6.47588	2	0.181189	0.225476
	3	9	2	3	-62	17.8	22.3	6.1	273.543	891	-42.38	65.3409	0.46	0.482468	-5.32874	42.9068	790	0.012	2	2.44007	45.2489	72.4638	2335.46	1427.45	0.078391	-49.77	7.39	757	1290	399	13.5139	1168.6	1119.42	-49.176	9.38086	18.9036	9.52273	3	0.0413394	0.0306363
	4	9	2	3	-69	13	16.8	8.7	517.857	718	-37.18	62.148	0.411111	0.435409	-4.06969	27.2314	500	4.69	1	10.505	33.557	46.5116	2700.24	2045.94	0.0874337	-53.16	15.98	518	1775	1057	13.2046	1105.73	741.216	-364.512	13.1752	8.3612	-4.81403	4	0.0320484	0.0206716
2020-09-01	1	10	1	3	-58	62.01	69.45	13.6	195.824	164	-41.53	74.0625	0.45	0.478973	-7.79626	37.2525	280	0.77	2	8.08049	26.455	52.9101	1999.64	1704.07	0.0871072	-49.3	7.77	137	245	81	78.1022	247.66	258.916	11.256	7.5815	7.88022	0.298719	1	0.0928136	0.0907327
2002-10-01	1	9	1	3	-68	14.8	20.15	9.1	451.613	459	-43.19	81.3348	0.5	0.564242	-9.23483	40.6636	560	3.99	1	7.90626	22.7273	39.5257	3996.69	3471.21	0.0848741	-55.8	12.61	336	1143	684	12.5	525.635	260.68	-264.955	10.6724	8.726	-1.94635	4	0.0340297	0.0222143
	2	9	1	3	-67	23.01	24.55	3.4	138.493	829	-38.56	65.369	0.5	0.588119	-4.67705	44.0534	860	3.07	1	5.66709	31.25	46.083	2849.34	1996.96	0.0872421	-51.12	12.56	606	1404	575	14.6535	1019.4	854.968	-164.434	8.19672	8.4674	0.270679	4	0.0343773	0.0226517
	3	9	1	3	-70	31.9	34.65	17.3	499.278	324	-42.7	76.8669	0.6	0.944141	-5.48184	68.7517	160	2.4	1	6.20123	20.4499	31.25	1858.71	1510.17	0.0584531	-53.6	10.9	221	560	236	28.9593	325.96	47.06	-278.9	4.41112	4.1632	-0.247919	4	0.0437392	0.0139761
	4	9	1	3	-67	31.6	35.7	11	308.123	287	-43.8						260	1.9	1	7.12187	20.5339	34.6021	2278.92	1967.97	0.0752564	-51.79	7.99	240	473	186	34.2083	436.344	209.46	-226.884	5.81395	5.93824	0.124289	4	0.0647069	0.0247049
2001-12-02	2	9	1	3	-55	113	129.4	15	115.92	63	-51.2	61.7158	1.38	2.37724	-5.72648	116.911	50	0.04	2	5.25131	5.65291	31.0559	1452.01	1388.24	0.042183	-57.3	6.1	33.1	79	16	81.571	38.3656	51.3396	12.974	3.10126	2.83728	-0.263974	1	0.0583649	0.0591773	-25.6348	-0.220989	-50.0488	-0.431455
	4	9	1	3	-54	85.6	114.1	27.7	242.77	187	-34.6	78.0545	0.542	0.612151	-2.90008	45.2564	150	2.9	1	10.8694	30.722	58.9971	1479.23	1291.66	0.137928	-48.03	13.43	150	314	127	79.8	244.248	238.888	-5.36	8.3647	7.02494	-1.33976	1	0.117764	0.112851	-39.06	-0.160741	-67.749	-0.278803
	5	9	1	3	-60	73	119	10.8	90.7563	109	-42	86.6589	1.32	0.697266	-3.00535	57.4449	90	0.04	2	8.18284	17.1233	52.356	626.67	517.12	0.111271	-53.04	11.04	85	188	79	81.8824	103.853	182.059	78.2055	3.43407	4.66418	1.23011	2	0.103526	0.239569	-20.1416	-0.221336	-81.1768	-0.892052
03.12.2019	1	10	2	3	-50	90.5	90.8	6.1	67.1806			74.0732	0.888	0.882019	-2.54836	32.0791	100	0.02	2
	2	10	2	3	-51	85.7	129.1	19.7	152.595	70	-45.2	79.7669	0.782	0.812202	-11.0438	51.437	70	0.15	2	10.4209	15.674	42.9185	999.06	928.57	0.101471	-56.3	11.1	42	126	56	88.0952	71.8726	90.0504	18.1778	6.19387	7.6365	1.44263	1	0.135762	0.0874576	-22.583	-0.147601	-75.0732	-0.490675
04.12.2019	2	10	1	3	-72	26.1	26.25	9.2	350.476	710	-39.4	74.2141	0.574	0.795809	-7.5672	54.5079	650	4.2	1	5.42639	27.8552	43.1034	1880.82	1170.26	0.0596816	-51.7	12.3	489	1126	416	16.9734	947.44	689.6	-257.84	7.60456	8.69943	1.09487	4	0.0220447	0.0146215	-0.610352	-0.00173889	-433.35	-1.23461
	3	11	1	3	-69	32	16.24	6.8	418.719	1010	-37.5	65.9939	0.546	0.536082	-6.15159	34.8299	919	3.19	1	7.71755	36.5631	44.9438	3925.41	2155.88	0.114308	-51.24	13.74	723	1753	743	12.1162	1486.3	1186.99	-299.31	10.0402	8.83783	-1.20233	4	0.0272788	0.0182277	-17.0898	-0.0407872	-405.273	-0.96724
	4	11	1	3	-65	32	14.4625	12.4	857.39	440	-31.3								1	13.0748	20.429	40.3226	2498.59	2057.64	0.102545																-14.6484	-0.0170927	-215.454	-0.251405
2022-01-01	1	8	1	3	-60.3	37.01	40.2	12.4	308.458	368	-38.02	66.6431	0.672	0.883723	-5.98628	66.8124	310		1	6.18283	21.645	33.557	1369.82	1000.93	0.0750883	-53.4	15.38	205	845	477	32.1951										70.8008	0.229129	-317.993	-1.0291
	2	8	1	3	-60.5	42.9	78.1	25.3	323.944	225	-38.7	78.0401	0.682	0.845725	-7.8705	87.08	180		2	7.59385	17.2712	28.7356	1750.5	1525.21	0.0626476	-49.5	10.8	187	382	157	56.1497										50.6592	0.15684	-633.545	-1.96144
	3	8	1	3	-62.6	12.5	21.05	9.2	437.055	591	-41.1	67.0718	0.626	0.62158	-8.54864	43.6895	550		1	7.2215	22.2469	38.61	2590.26	1924.28	0.0618746	-51.7	10.6	341	2007	1416	24.3402										-113.53	-0.259794	-1472.17	-3.36881
2023-01-01	1	11	1	3	-60	12.9	22.75	14.6	641.758	514	-44.68	77.9286	0.564	0.529342	-7.54009	37.3826	500		1	8.27526	31.6456	50.1253	3289.21	2790.6	0.179925	-53.4	8.72	505	750	146	13.0693										-57.373	-0.0893661	-1437.38	-2.23891
	2	11	1	3	-68.6	13.4	17.7	10.6	598.87	600	-38.06	72.0965	0.484	0.466478	-8.07279	29.8351	480		1	9.41521	33.8409	53.4759	3237.66	2701.9	0.17313	-54.2	16.14	374	1291	691	15.508										-26.8555	-0.0448338	-1244.51	-2.07764
2027-01-01	1	8	2	3	-53	72.5	87.6	11.5	131.279	97.5	-37.5						200		2	8.58943	20.8768	32.2581	428.66	331.15	0.166313	-51.4	13.9	67	163	65.5	128.358
	2	8	2	3	-63	25.1	51.9	19.6	377.649	253	-43.6	79.1146	0.706	0.740363	-8.50275	58.4916	240		2	8.29196	18.622	36.4963	2245.76	1992.2	0.0507125	-50.23	6.63	216	380	127	45.2315
	3	8	2	3	-65	23.86	32.3	11.4	352.941	781	-35.2	77.8775	0.59	0.745216	-8.38973	60.702	770		2	8.64612	28.0899	32.8947	2061.11	1248.47	0.0700755	-44.19	8.99	673	1049	268	23.4918
2029-01-01	1	10	1	3	-52	54.4	59.25	12.8	216.034	291	-30.5	68.6964	0.798	1.16659	-6.46661	90.9619	260		2	6.51377	14.9925	30.6279	1189.61	898.08	0.0421794	-48.6	18.1	204.3	550	259	55.8003
	2	10	1	3	-62.4	18.12	24.15	10.4	430.642	506	-38.4	71.4732	0.474	0.526584	-5.59433	40.0372	350		1	9.13622	29.7619	49.505	2561.31	2023.51	0.0837334	-53.4	15	384	1226	720	17.1875
2005-02-01	1	9	1	3	-64.4	12.14	18.6	13.5	725.806	705	-38.8	68.8358	0.52	0.491577	-6.22044	32.6194	700		1	11.9479	38.3877	49.8753	2955.97	2219.38	0.102003	-56.5	17.7	391	2284	1579	8.95141
	2	9	1	3	-63	40	60.05	26.3	437.968	481	-31.5	70.7905	0.694	0.836627	-3.74378	68.1119	400		1	10.0227	23.8663	25.6082	966.76	604.355	0.0573518	-47.24	15.74	251	582	101	50.8367										-21.3623	-0.0487724	-640.869	-1.46317
2020-02-10	1	8	2	3	-66	36.9	42.1	11.4	270.784	369	-40.62	73.7478	0.604	0.806024	-6.279	47.5024	270		1	9.06701	22.0751	45.5581	2023.22	1653.95	0.0602302	-51.9	11.28	290	658	289	27.931										4.27246	0.0157655	-427.856	-1.57881
	2	8	2	3	-54	55.6	62.1	16	257.649	90.9	-48.46	90.4107	1.024	0.737672	-8.28432	63.8813	50		2	8.84477	27.933	45.045	1274.98	1183.92	0.0774122	-54.7	6.24	74	148	57.1	71.6216
2020-02-13	1	10	1	1	-59	32.9	33.85	13.6	401.773	471	-38.92	70.9916	0.63	0.790627	-5.85514	42.1267	400		1	12.8645	24.3605	43.4783	1446.8	974.925	0.0690295	-52.25	13.33	302	869	398	25.6623										-4.88281	-0.0121463	-383.911	-0.955003
	2	10	1	1	-57	61.3	189.2	35	184.989	118	-35.44	77.1513	0.82	1.11759	-4.10597	78.9979	100		2	9.50562	23.2558	28.169	803.64	685.74	0.0785513	-49.35	13.91	82.4	174.4	56.4	129.248										-18.3105	-0.0989759	-498.047	-2.69215
	3	10	1	1	-72	58.01	142.2	34.5	242.616	88.2	-37.9	70.0613	0.848	1.1378	-11.7427	109.431	70		2	6.41606	19.5312	20.9205	1095.91	1007.86	0.0573087	-52.3	14.4	56.4	179.8	91.6	136.525										-23.1934	-0.0954459	-104.37	-0.429507
2020-02-14	1	10	2	1	-57	326	290.5	47.6	163.855	23.1	-46.6	80.4451	0.84	1.00755	-10.369	78.7516	20		2	7.43037	30.7692	39.2157	875.79	852.37	0.101628	-57.2	10.6	16.8	56.8	33.7	166.667										-11.5967	-0.0707115	-213.013	-1.29886
	2	10	2	1	-60	15.14	30	8.5	283.333	541	-39.91	67.2851	0.644	0.625468	-8.36853	40.0189	430		1	8.83362	25.2845	57.1429	3249.72	2680.94	0.133038	-52.06	12.15	417	1061	520	19.0408										-3.05176	-0.0107836	-1566.77	-5.5363
	3	10	2	1	-52	20.8	33.8667	20.1	593.504	266	-39.8	73.1544	0.5	0.500108	-3.88279	63.4821	315		2	8.31155	33.9559	80.3213	1440.95	1174.92	0.0484394	-53.44	13.64	222	595	329	29.5495
2020-02-19	1	8	2	1	-60	28.6	34.65	15.9	458.874	315	-41.6	77.7468	0.644	0.755948	-9.09256	50.3667	250		1	9.11844	22.8833	41.6667	2332.57	2016.69	0.0596461	-51.9	10.3	261	595	280	31.0345										-43.335	-0.0693359	-1038.82	-1.66211
	2	8	2	1	-61	67.29	82.5	16.5	200	55.8	-48.4	74.9599	0.704	0.822808	-11.0816	57.3001	50		2	9.53413	14.7167	56.0224	1210.13	1154.32	0.10256	-55.02	6.62	45.2	120	64.2	110.177										-42.1143	-0.210571	-672.607	-3.36304
2020-02-20	1	9	1	1	-58	37.9	40.75	10.6	260.123	358	-40.3	65.0986	0.666	0.684961	-8.1966	45.9514	250		1	11.0839	29.0276	46.9484	2118.15	1759.5	0.0804429	-50.9	10.6	276	560	202	32.971
	2	9	1	1	-57	52	102.7	49	477.118	64.6	-42.8	79.0986	0.7825	1.03241	-11.8475	112.055	45		2	5.24798	7.97448	29.2826	2288.09	2223.26	0.0279671																4.27246	0.00895694	-705.566	-1.47917
	3	9	1	1	-68	8.24	12.8	8	625	933	-36.8						1300		1	22.434	41.1523	48.7805	2280.77	1347.93	0.0418269	-51.6	14.8	417		-933	20.1439										-43.335	-0.0693359	-1038.82	-1.66211
	4	9	1	1	-59	21.7	24.1	9.1	377.593	819	-33.05	66.1756	0.512	0.629435	-6.32282	31.6541	750		1	15.2977	32.1543	40	2566.69	1842.75	0.058987	-50.75	17.7	538	1628	809	17.1933										-34.79	-0.0920371	-490.723	-1.29821
2026-02-01	1	7	2	1	-64.5		32.2	8.5	263.975								500		1							-51.3	9.1	424	846	229	20.5189
	2	7	2	1	-67	19.62	20.45	11.1	542.787	782	-39.86	74.9261	0.762	0.555876	-6.00452	34.3248	750		1	17.7678	42.6439	48.4262	1660.58	877.59	0.120111	-52.9	13.04	491	1559	777	14.4603
2003-03-01	1	8	1	1	-65.3	206.3	215.8	64	296.571	63.1	-43.15	91.7844	1.024	1.1727	-6.43291	124.887	35		2	6.60909	9.5511	28.0112	1114.78	1051.41	0.0770445	-54.3	11.15	45	97.1	34	126.667										-116.577	-0.392516	-902.71	-3.03943
	2	8	1	1	-65	93.1	128.2	48.4	377.535	75.8	-43.6	88.6282	0.884	0.965732	-4.99061	80.7452	80		2	6.51894	10.3306	33.8983	1892.89	1816.79	0.072645	-55.13	11.53	53	183	107.2	91.8868										1.2	0.0031746	-524.3	-1.38704
	3	8	1	1	-62	243.5	180.5	75	415.512	44	-40.96	81.9483	0.92	1.02999	-8.79967	112.865	60		2	5.52842	6.08273	32.6797	1744.72	1700.09	0.0512127	-54.3	13.34	41.7	134	90	136.691										-54.3213	-0.13058	-921.021	-2.21399
2004-03-01	1	9	1	3	-65	20.66	29	14.8	510.345	401	-43.8	75.8906	0.648571	0.637754	-10.715	49.8894	319		1	10.9815	26.2467	43.6681	2246.35	1844.48	0.0773439	-55.2	11.4	249	823	422	19.2771
	2	9	1	3	-70	29.5	39.05	18.2	466.069	152.7	-45.21	87.2694	0.538	0.640083	-4.78489	42.3096	110		1	7.51096	17.5901	42.3729	1671.8	1519.1	0.074359	-57.2	11.99	114	405	252.3	24.5614
	3	9	1	3	-64.5	73.2	86	26.1	303.488	328	-40.7	86.0473	0.7	0.93598	-9.40997	80.093	200		1	7.81075	20.6186	33.7838	1612.25	1283.81	0.0590499	-47.9	7.2	283	446	118	42.7562
2009-03-01	1	8	2	3	-61	16.6	23.95	17.1	713.987	364	-36.68	69.1981	0.602	0.695394	-5.22664	38.5529	300		1	9.34333	23.0947	39.7614	2185.17	1820.36	0.0836119	-52.7	16.02	280	877	513	26.0714
	2	8	2	3	-52	26.7	32.05	8.6	268.331	341	-41.8	74.0159	0.61	0.725999	-6.78661	51.4179	300		1	5.21872	17.6523	33.9559	2149.75	1808.16	0.0647621	-48.8	7	304	522	181	36.8421
	3	8	2	3	-67	24.3	31.2	13.57	434.936	274	-44.6	80.9628	0.556	0.609292	-6.71	38.6953	200		1	9.67082	24.6914	45.3515	2200.1	1925.92	0.107694	-54.8	10.2	232	634	360	22.4138
25.01	4	8		3			108.6	41.8	384.9										1															-44.7											-54.44	-35.18	-267	-0.693687
26.01	1	9		3			123	35.2	285.7										1															-85.2											-53.2	-40.1	-59.7	-0.20896
27.01	1	10		3			29.5	11.3	383										1															-270											-47.835	-33.31	-428.8	-1.11958
	2	10		3			38.7	10.5	271.6										1															-143											-61.89	-40.1	-294	-1.08247
	3	10		3			14.3	10.1	707.3										1															-476											-49.82	-28.51	-1055	-1.49159
2.02	1	12		3			27.8	12.7	457.66										1															-217											-51.04	-29.48	-564	-1.23236
5.02	2	8		3			27.8	11.7	421.6										1															-273											-52.5	-34.7	-267	-0.633302
	3	8		3			34.65	12.1	349.2										1															-231											-46.96	-29.77	-214	-0.612829
	6	8		3			45.6	24.6	539										1															-243											-45.07	-34.25	-141	-0.261596
11.02	1	9		3			34.2	15.7	459										1															-81.4											-53.862	-36.936	-392	-0.854031
	3	9		3			38	11	289										1															-166.9											-49.308	-30.15	-221	-0.764706
	6	9		3			35.4	19.4	548										1															-317.1											-51.329	-34.058	-497.5	-0.907847
12.02	1	10		3			9.6	15.8	1639										1															-223											-59.76	-45.7	-721.7	-0.440329
18.02	2	7		3			26	9.5	363										1															-246											-44.618	-26.4	-425.9	-1.17328
	3	7		3			34	14.2	417										1															-224.9											-46.838	-28.42	-456.7	-1.0952
	4	7		3			47	10	211										1															-161											-48	-32.45	-129.2	-0.612322
19.02	1	8		3			36.9	20.7	560										1															-214											-51.44	-32.22	-206	-0.367857
	3	8		3			33	19.6	592										1															-265											-52.9	-27.4	-593.8	-1.00304
	4	8		3			52	17.5	337										1															-103											-52.5	-39.124	-184	-0.545994
22.02	1	11		3			61	23.8	390										1															-199.5											-51.79	-38.1	-65.9	-0.168974
	4	11		3			23.7	11.5	486										1															-483											-39.93	-22.66	-219.1	-0.450823
23.02	1	12		3			40	14	363										1															-562											-54.21	-33.71	-562	-1.54821
	2	12		3			39.5	10.8	273										1															-236											-50.3	-33.1	-532	-1.94872
24.02	2	8		3			37.9	15	396										1															-307											-45.86	-30.98	-459	-1.15909
1.03	1	10		3			31.3	17.1	546										1															-320.8											-50.471	-29.685	-688.5	-1.26099
4.02	1	12		3			55.5	22.7	409										2															-42											-51.51	-39.23	-81.3	-0.198778
5.02	4	7		3			18.9	11.4	601										2																										-55.74	-38.4	-341	-0.567388
5.02	5	8		3			48.9	10	204										2															44.8											-67.03	-53.3	-79.5	-0.389706
9.02	2	8		3			63.8	7.6	119										2															81											-59.964	-41.11	-126.9	-1.06639
9.02	1	7		3			60.4	14.2	235										2															-14.6											-58.47	-43.04	-100.5	-0.42766
11.02	2	7		3			31.1	17.7	569										2															-18											-52.95	-37.87	-60.6	-0.106503
24.02	4	9		3			131.5	24.6	187										2															-4.5											-64.46	-40.73	-130.2	-0.696257
1.03	2	10		3			55.7	25.2	452										2															77											-59.964	-35.21	-366	-0.809735
15.03	2	7		3			45	12.6	280										2															-88											-57.2	-37.3	-295	-1.05357
18.03.2021	3	7		3			55.3	6.9	125										2															-19.5											-53.2	-32	-60.3	-0.4824
19.03.2020	1	7		3			140	29.5	211										2															-34.5											-57.6	-35.1	-152	-0.720379
	2	7		3			71.9	19.1	266										2															-80											-58.9	-43.876	-52	-0.195489
	3	7		3			95.1	16.4	172										2															-64											-62.84	-43.2	-80	-0.465116
23.03.2021	2	12		3			87.5	25.2	288										2															35.4											-56.5	-33.9	-363.3	-1.26146
24.02	4	11		3			131.5												2																										-64.46	-40.73	-130.2
23.03.2021	2	11		3			87.5												2																										-55.19	-36.936	-581
01.09.2021	1	8		3			145												2																										-66.5	-62.3	-35
02.09.2021	1	9		3			55												2																										-54	-39	-341
	2	9		3			105												2																										-75.8	-35.3	-273
04.09.2021	1	11		3			72.6												2																										-59.4	22.98	-135
5.09.2021	1	12		3			256												2																										-64.5	-37.63	-127
	2	12		3															2																										-55.48	-37.9	-95.2
	3	12		3			99.2												2																										-58.8	-43.62	-130.3
22.09.2021	1	7		3			56.2												2																										-48.2	-35.3	-97
	2	7		3			28.7												2																										-49.5	-38	-140
	3	7		3			121												2																										-69	-48	-183
4.02	1	7		3															2																										-51.51	-39.23	-81.3
9.02	2	7		3			63.8												2																										-59.964	-41.11	-126.9
15.09	1	7		3			50												2																										-45.7	-29.9	-104.7
	2	7		3			53.3												2																										-52.95	-39.953	-71.2
16.09	1	8		3			28.9												2																										-62.53	-36.76	-104
	2	8		3			42.7												2																										-48.65	-37.99	-60.8
17.09	3	9		3			59.8												2																										-56.6	-34.18	-92
	4	9		3			80												2																										-52.86	-37.63	-95
18.09	1	9		3			169												2																										-59.043	-37.512	-42.2
	2	9		3			58																																						-59.24	-36.8	-81

## Sheet: W1
Animal Info										Rec Ramp							MN Type			Repetitive Firing						SubTH V Trajectory						PIC Ramp Rec-Derec/Firing Rate Hysteresis									H-Current				PIC
Date	Cell no	Age (PX)	Sex (M:1, F:2)	Segment (1,2,3)	Vm	Rin SS	Rin Pass	Tau	CapCalc	Rheobase ramp	spike TH Ramp	Spike Amp	Spike RT	Spike HW	AHP amp	AHP HW	Rb 5s step	RF latency	Fast (1) Slow (2) trans (3)	Min FR	FR 2*Rb	Max FR	Offset Current	Current range	SPR Slope	Vtakeoff	dV	Ito	Itheoretical	Itheo-Iactual	Rm Passive	Ionset	Ioffset	Delta I	Freq onset	Freq offset	Dfreq	Type	Inc Slope	Dec Slope	Ih -70	Ih dens -70	Ih -110	Ih dens -110	Onset V	Peak V	I Max	I Dens
2019-01-25	1	4	2	3	-63	40.12	35.4	11.1	313.559	493	-41.5	70.7	0.94	0.91	-8.23263	49.1729	460	3.909	1	10.4676	26.1097	32.5521	1193.45	706.356	0.0559886	-45.9	4.4	416	569	76	33.8942
	2	4	2	3	-67	24.6	21.6667	8.5	392.308	961	-33.91	66.4	0.5	0.528	-6.84774	42.837	950	3.07	1	11.5642	33.0033	34.0136	1500.82	538.4	0.154627	-41.8	7.89	826	1267	306	22.0339
2019-02-05	1	2	1		-60	17.2	30.4	11.5	378.289	757	-40.25	79	0.4	0.73	-3.49093	41.1039	800	0.011	2	19.0707	38.4615	38.9105	1500.68	744.99	0.0739702	-48.19	7.94	597	985	228	19.7822	993.504	1076.9	83.392	17.6367	13.3156	-4.32111	2	0.0282675	0.035976
	2	2	1		-61	78	111.7	22.8	204.118	123	-36.3	77.5	0.7	0.988	-2.73307	102.98	100	0.41	2	8.92765	20.7039	39.6825	766.52	639.86	0.123008	-48.9	12.6	85.7	178.5	55.5	129.522	207.48	295.944	88.464	4.62749	4.10678	-0.520711	2	0.0691049	0.0861445
	3	2	1		-62	22.7	26.0333	8.9	341.869	580	-40.99	73.65	0.4	0.569	-12.6611	42.2303	550	3.6	1	13.9555	30.3951	37.1747	1498.66	917.02	0.0756982	-50.57	9.58	518	988	408	18.2046	1121.94	1201.75	79.8121	29.8507	23.31	-6.54072	2	0.00977596	0.0196651
	4	2	1	1	-61	43.55	50.05	11.7	233.766	420	-37.3	74.6	0.7	0.658	-4.46354	47.8958	380	4.03	1	14.7464	31.4465	43.6681	1499.54	1074.58	0.0747786	-46.2	8.9	336	535.2	115.2	41.0714	722.208	842.952	120.744	7.11744	4.19463	-2.92281	1	0.0511792	0.0606335
2019-02-06	1	1	1	2	-62	67.7	87.6	16.6	189.498	197	-41.6	84.2	0.7	0.86	-11.2682	61.5568	130	1.92	1	9.52228	23.5294	44.6429	1234.26	1033.72	0.0995821	-53.9	12.3	172	368	171	35.4651	99.184	122.856	23.672	6.64452	5.64972	-0.994801	2	0.0588144	0.068002
	2	1	1	2	-64	45.36	49.6	9	181.452	465	-31.68	67.8	0.9	0.822	-4.13088	31.759	380	4.6	1	19.5096	38.61	43.4783	1435.67	965.84	0.113466	-49.3	17.62	272	732	267	39.3382	546.002	290.131	-255.87	17.1233	10.1937	-6.92961	4	0.0518889	0.0346579
	3	1	1	3	-69	34.8	37.4	13	347.594	344	-42.76	79.14	0.5	0.66	-5.88395	45.0144	340	3.6	1	11.6344	34.6021	49.0196	1500.22	1153.59	0.0939769	-52.03	9.27	257	503	159	31.0117	430.934	248.29	-182.644	11.7233	7.51315	-4.21018	4	0.0695112	0.0454164
	4	1	1	3	-68	50.5	59.8	18.9	316.054	292	-40.47	76.02	0.5	0.66	-11.3303	48.431	230	3.22	1	10.7457	25.3807	46.2963	1500.53	1206.39	0.0696799	-47.02	6.55	275	467	175	47.2	222.744	295.416	72.672	8.10373	7.26216	-0.841563	2	0.0413966	0.0516902
2019-02-11	1	3	1		-58	51	55.55	9.8	176.418	201	-38.5	67.8	1	1.37	-6.34034	52.7063	360	0.18	2	12.9497	22.1729	29.1545	1080	672.1	0.0169368	-47.9	15.8	406	589.7	388.7	29.803	459.724	276.644	-183.08	13.8696	7.29395	-6.57568	3	0.0256084	0.0237857
	2	3	1		-61	49	51.25	10.5	204.878	589	-35.6	76.2	0.699	1.079	-6.26565	50.315	480	3.3	1	14.6605	28.0112	31.5457	1500.89	907.99	0.0273513	-40.8	5.2	448	597	8	42.8571
	3	3	1		-66	70	146.8	37.6	256.131	197	-35.3	72.9	0.799	1.39	-5.37618	135.105	110	4.3	1	11.1858	18.797	19.6078	413.21	209.93	0.0559427	-49.9	14.6	72.8	179	-18	138.736
	4	3			-69	90	169.4	35.7	210.744	146	-38.2	72.3	1	1.43	-4.32653	92.223	140	0.247	2	8.99515	15.1976	20.0401	802.92	652.26	0.0704273	-51.6	13.4	60	171	25	140	186.168	136.704	-49.464	8.57633	4.1806	-4.39573	3	0.0451678	0.0465749
2019-02-12	1	4		1	-65	70	106.8	29.1	272.472	134	-44.8	73.5	0.801	1.24	-5.20342	66.4713	100	3.7	1	8.44875	15.361	29.7619	731.2	595.97	0.0589981	-50.9	6.1	103	168	34	88.3495	136.744	77.168	-59.576	6.02047	4.83559	-1.18488	4	0.0502259	0.0418851
	2	4		3	-62	39	47.45	15.2	320.337	409	-35.58	75.2	1	1.07	-5.93753	61.0693	310	0.028	2	8.012	19.3424	25.5754	1501.02	1088.54	0.0477107	-50.17	14.59	276	673	264	35.6159
	3	4		3	-65	22	26.55	14.4	542.373	1010	-35	73.4	0.601	0.844	-5.09683	52.858	775	4.35	1	24.013	30.1205	30.303	1498.83	488.78		-48.7	13.7	563	1178	168	20.071	1007.39	495.684	-511.704	17.5131	10.9769	-6.53619	4	0.0239299	0.0175702
2019-02-16	1	1			-59	90	150.8	35.5	235.411	101	-39.5	78.5711	0.98	1.55928	-4.63963	107.43	90	0.21	2	8.93748	16	27.933	785.13	676.49	0.080745	-50.6	11.1	72.8	166	65	129.121
	2	1			-50	48	48.8	6.8	139.344	174	-37.7	61.008	1.49	1.94661	-1.07755	24.7237	275	0.04	2	7.26422	16.8067	28.0899	998.61	822.69	0.08397	-47.7	10	140	265	91	87.8571
	3	1			-63	34	35.7	9.5	266.106	266	-34.4	77.2049	0.95	1.40349	-1.68768	50.5066	500	0.018	2	7.27648	21.8818	33.1126	999.29	731.2	0.0739468	-48.16	13.76	212	444	178	55.8491
	4	1			-62	53	56.5	16.7	295.575	373	-39.6	81.8247	0.94	1.27956	-4.42198	59.4436	290	0.1234	2	11.0571	24.4499	30.9598	1342.65	967.4	0.0576155	-48.2	8.6	282	457	84	41.844
2019-02-17	1	2			-65	64	65.3	14.6	223.583	443	-34.3	76.4847	1.12	1.67833	-3.80195	79.2565	300	0.0136	2	11.1042	15.7978	16.9205	842.85	398.53	0.0179738	-51.06	16.76	187	536	93	47.8075
	2	2			-57	36	48.5	13.8	284.536	540	-29	70.8842	0.97	1.19732	-3.72106	57.685	490	3.86	1	9.24735	21.5517	26.5252	1732.29	1168.9	0.0443442	-50.29	21.29	307	921	381	31.6287
	3	2			-50	61	67.6	17.5	258.876	232	-38.7	77.0462	0.84	1.24292	-7.41385	86.1797	210	0.4	1	7.89217	18.0832	36.3636	1320.15	1095.85	0.0725387	-45.1	6.4	203	305	73	73.399
	4	2			-61	40	51.25	19.3	376.585	271	-40.5	73.3046	0.72	0.945879	-5.5126	52.4098	210	3.84	1	9.48314	22.8311	33.8983	1447.66	1174.87	0.074774	-51.5	11	214	469	198	39.7196
	5	2			-60	38	47.9	20.3	423.8	401	-38.7	74.9868	0.79	0.958632	-7.65635	75.0767	319	3.03	1	7.41683	22.5734	33.0033	1618.79	1205.25	0.0581849	-50.14	11.44	315	609	208	31.3016
2019-02-18	1	3			-61	33	42.9	17	396.27	326	-43.8	77.0672	0.82	0.861677	-8.58374	60.9827	190	4.3	1	7.51264	21.9298	42.3729	1833.2	1490.03	0.0629444	-53.5	9.7	219	490	164	29.6804
2019-02-21	1	1			-61	36	64.85	22.3	343.87	466	-35.4	75.221	0.95	1.125	-5.10204	71.9342	340	0.16	2	9.27006	22.1729	26.738	1325.64	857.73	0.0492966	-50.3	14.9	319	773	307	30.4075
	2	1			-68	37	37.5	4.2	112	192	-34.12	76.5211	0.9	1.19594	-6.26301	56.1191	130	4.5	1	8.02353	20.7039	32.4675	1105.92	912.33	0.0864726	-47.4	13.28	141	281	89	89.3617
	3	1			-59	58	91.1	28	307.355	154	-38.5	83.1334	0.81	1.02316	-8.95333	84.0617	85	3	1	6.88757	14.1844	35.8423	1191.1	1035.7	0.0607399	-51.2	12.7	121	262	108	72.7273
	4	1			-63	58	77.8	17.4	223.65	120	-40.59	80.7362	1	1.087	-6.79654	67.2337	90	3.82	1	10.8057	20.202	42.3729	1100.92	979.24	0.0953527	-51.8	11.21	83.5	196	76	98.2036
	5	1			-61	59.8	75.25	16.3	216.611	194	-38.5	81.8097	0.7	0.921315	-8.04494	70.0732	130	1.92	1	10.5427	19.084	44.4444	1419.35	1223.09	0.111023	-51.7	13.2	122	306	112	68.0328
2025-02-01	1	1			-66	87.1	118.1	18	152.413	130	-34.56	78.3243	1.27	1.74228	-2.81989	82.3119	80	0.0293	3	24.3438	24.5098	29.4118	285.67	154.16		-46.2	11.64	59.8	115	-15	230.769
	2	1			-60	71	91.7	15.1	164.667	296	-31.4	70.8961	0.95	1.23013	-7.65592	69.2126	200	3.91	1	10.4749	22.0264	29.1545	1107.05	808.45	0.0636295	-39.8	8.4	247	355	59	81.7814	275.148	163.548	-111.6	10	5.92417	-4.07583	4	0.0398689	0.0336355
	3	1			-56	50.7	95.5	30.7	321.466	208	-39.8	81.2539	0.82	1.03054	-5.69958	63.7373	110	3.912	1	9.22721	25.1256	38.3142	1315.78	1105.79	0.125926	-52.8	13	129	382	174	55.814
	4	1			-65	32.9	36	8.4	233.333	356	-35.9	72.8478	1	1.19562	-3.57084	53.4285	250	0.02	3	10.5863	22.4215	26.738	937.46	579.4	0.0700199	-56.5	20.6	287	534	178	12.1951
	5	1			-62	61.2	99.95	26.3	263.132	269	-30.24	69.7381	1.12	1.09924	-3.04114	52.6567	205	0.206	2	12.1809	24.8756	34.1297	1289.86	1019.42	0.0726369	-47.45	17.21	155	347	78	80.9677	263.94	194.056	-69.8841	10.8696	8.34028	-2.52928	3	0.0495231	0.0433792
2026-02-01	5	1			-62	58.3	68.5	13.4	195.62	310	-38.6	82.9274	0.96	1.26315	-5.25852	62.3035	210	0.0232	2	9.1578	24.7525	31.9489	1293.47	981.35	0.123861	-46.7	8.1	255	406.6	96.6	52.1569	331.074	218.304	-112.77	10.5708	8.07102	-2.4998	3	0.0344031	0.0307965
2027-02-01	1	2		1	-56	61.5	82.1	17.8	216.809	189	-39.67	79.3284	0.86	1.21084	-7.68987	88.338	160	0.261	2	6.16982	13.2626	28.2486	1049.86	859.27	0.0460684	-51.6	11.93	130	278	89	64.6154
	3	2		3	-67	62.8	95.35	19.7	206.607	281	-34.9	87.723	0.72	0.984852	-4.81976	54.977	210	0.0982	2	8.43769	19.1205	27.027	1090.73	807.4	0.0484671	-42.2	7.3	268.8	373.9	92.9	66.2202	253.764	352.02	98.256	5.45852	7.63942	2.1809	2	0.0404555	0.043121
	4	2		3	-60	42.2	56.15	16.3	290.294	725	-33.6	76.5099	0.75	0.93042	-5.19743	56.9395	410	0.1118	2	21.0295	22.7273	26.2467	1132.19	405.78	0.0200532	-39.3	5.7	577	693	-32	35.8752
2011-03-01	2	1		1	-63	61.6	64.25	17.7	275.486	296	-36.6	71.5666	0.98	1.16408	-3.60732	61.9002	230	3.7	1	7.44455	23.4742	28.3286	1029.19	732.18	0.0786009	-48.3	11.7	231	426	130	50.6494	308.966	183.61	-125.356	7.37463	7.49625	0.121621	4	0.0536503	0.0395219
	3	1		1	-68	51.8	65.6	20	304.878	308	-33.8	79.1944	0.81	1.06588	-6.40931	61.7132	240	2.4	1	10.6008	29.4118	34.7222	1062.7	753	0.101493	-46.3	12.5	213	405	97	64.3192
	4	1		3	-65	48.1	51.8	10.4	200.772	384	-40.28	78.5943	0.72	1.07427	-3.90346	42.8118	250	4.86	1	10.7872	31.9489	37.1747	1427.25	1041.72	0.117988	-52.6	12.32	237	538	154	31.2236
2012-03-01	1	1		3	-63	99.9	167.5	30	179.104	118.2	-37.2	81.5894	0.91	1.27352	-9.05856	83.2161	75	2.33	1	10.5749	21.4133	38.4615	824.31	704.8	0.134848	-53.7	16.5	62.3	217	98.8	101.124
	2	1		3	-61	55.6	59	12.2	206.78	323	-35.4	72.4347	0.88	1.2099	-6.41206	66.023	275	2.85	1	9.4853	23.6967	30.303	1260.97	936.66	0.0780754	-42.8	7.4	278	415	92	61.8705	334.285	195.226	-139.059	7.01754	6.04961	-0.967937	4	0.0484446	0.0332215
	3	1		3	-55	62.2	71.5	25.8	360.839	388	-33.1	78.4921	1.4	1.3853	-6.16991	87.726	240	0.02	3	13.2992	19.3424	20.1613	648.46	253.52	0.0346424	-41.5	8.4	280	415	27	66.0714
2014-03-01	1	1		1	-66	54.6	48.7	17	349.076	493	-34.33	73.019	1.05556	1.26133	-3.87518	71.3867	439	0.065	2	8.12752	20.4918	26.0417	1082.22	587.66	0.105734	-38.15	3.82	482	501	8	45.332
	2	1		1	-64	68.5	105.15	15.9	151.213	370		67.241	1.29	1.38411	-5.67089	75.0666	290	0.163	3
	3	1		1	-68	72.1	99.65	21.13	212.042	166	-38.15	72.299	0.65	0.899768	-5.50123	72.1629	120	4.53	1	16.3914	29.3255	36.63	442.34	274.09	0.0950126	-51.03	12.88	86	205	39	104.302	158.058	116.616	-41.442	10.1937	8.05802	-2.13566	3	0.0840155	0.0777532
2018-03-01	1	3		1	-58	57.2	79.2	13.4	169.192			64.7054	1.39	1.26723	-9.62559	64.6205	130	0.023	3
	2	3		1	-61	29.4	29.9	14.1	471.572	489	-38.02	72.9525	0.73	0.996628	-4.65661	48.5909	410	4.07	1	9.38266	26.9542	34.4828	1861.92	1355.36	0.0697305	-52.9	14.88	336	928	439	21.131	495.82	353.32	-142.5	11.274	9.08265	-2.19131	4	0.0358004	0.0291922
	3	3		3	-60	55.8	76.9	17.4	226.268	248	-41.5	78.7631	0.88	1.15068	-6.2241	55.7795	210	0.712	1	10.4656	24.6305	39.6825	1533.07	1267.12	0.0800199	-50.17	8.67	211	377	129	46.5877	275.904	36.768	-239.136	11.2994	4.82859	-6.47085	4	0.0574749	0.0406424
	4	3		3	-61	37.7	73.1	22.4	306.43	224	-39.22	75.7949	0.82	0.93533	-8.51931	68.7299	156	4.5	1	7.03857	17.0648	38.1679	1139.11	913.24	0.0659394	-50.26	11.04	170	360	136	57.2941	270.716	221.529	-49.1863	6.62691	5.46448	-1.16242	4	0.0484559	0.0403349
2006-08-01	1	2	2	1	-63	70.5	87.9	26.9	306.03			73.8081	0.49	0.925488	-2.80087	72.1643	140	0.1572	2							-52.7	12.94	112	302	131	65.1786	158.291	185.683	27.392	3.61533	5.60538	1.99005	1	0.0848545	0.0783906
2007-08-01	1	3	2	1	-66	35.4	34.8	11.5	330.46			73.4588	0.64	0.866223	-4.47704	39.6322	250	3.54	1							-50.45	8.55	221	416	129	43.2127	415.787	193.876	-221.911	7.55287	7.50188	-0.0509949	4	0.073092	0.0335608
	2	3	2	1	-67	54	52.8	8.3	157.197	218	-43.5	76.5336	0.6	1.02496	-3.38836	39.7892	219	0.1252	2							-50.6	7.1	152	326	108	61.8421	221.923	247.078	25.155	8	4.41112	-3.58888	2	0.0798743	0.0954241
